# Supplementary material for: Consequences of health condition labelling: protocol for a systematic scoping review
Source: PubMed Central journal article supplement — BMJ Open. 2020 Oct 26;10(10):e037392. doi: 10.1136/bmjopen-2020-037392 (PMC7592274; doi:10.1136/bmjopen-2020-037392), 2020-10-26
Supplement: bmjopen-2020-037392.draft_revisions.pdf [file bmjopen-2020-037392.draft_revisions.pdf]

# BMJ Open

BMJ Open is committed to open peer review. As part of this commitment we make the peer review history of every article we publish publicly available.

When an article is published we post the peer reviewers' comments and the authors' responses online. We also post the versions of the paper that were used during peer review. These are the versions that the peer review comments apply to.

The versions of the paper that follow are the versions that were submitted during the peer review process. They are not the versions of record or the final published versions. They should not be cited or distributed as the published version of this manuscript.

BMJ Open is an open access journal and the full, final, typeset and author-corrected version of record of the manuscript is available on our site with no access controls, subscription charges or pay-per-view fees (<http://bmjopen.bmj.com>).

If you have any questions on BMJ Open's open peer review process please email [info.bmjopen@bmj.com](mailto:info.bmjopen@bmj.com)

# BMJ Open

## Consequences of health condition labelling: protocol for a systematic scoping review

|                               |                                                                                                                                                                                                                                                                                                                                                  |
|-------------------------------|--------------------------------------------------------------------------------------------------------------------------------------------------------------------------------------------------------------------------------------------------------------------------------------------------------------------------------------------------|
| Journal:                      | <i>BMJ Open</i>                                                                                                                                                                                                                                                                                                                                  |
| Manuscript ID                 | bmjopen-2020-037392                                                                                                                                                                                                                                                                                                                              |
| Article Type:                 | Protocol                                                                                                                                                                                                                                                                                                                                         |
| Date Submitted by the Author: | 31-Jan-2020                                                                                                                                                                                                                                                                                                                                      |
| Complete List of Authors:     | Sims, Rebecca; Bond University, Faculty of Health Sciences and Medicine<br>Kazda, Luise; The University of Sydney, Sydney School of Public Health<br>Michaleff, Zoe; Bond University, Faculty of Health Sciences and Medicine<br>Glasziou, Paul; Bond University, CREBP<br>Thomas, Rae; Bond University, Faculty of Health Sciences and Medicine |
| Keywords:                     | PUBLIC HEALTH, QUALITATIVE RESEARCH, Quality in health care <<br>HEALTH SERVICES ADMINISTRATION & MANAGEMENT                                                                                                                                                                                                                                     |
|                               |                                                                                                                                                                                                                                                                                                                                                  |

SCHOLARONE™  
Manuscripts

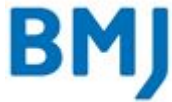

I, the Submitting Author has the right to grant and does grant on behalf of all authors of the Work (as defined in the below author licence), an exclusive licence and/or a non-exclusive licence for contributions from authors who are: i) UK Crown employees; ii) where BMJ has agreed a CC-BY licence shall apply, and/or iii) in accordance with the terms applicable for US Federal Government officers or employees acting as part of their official duties; on a worldwide, perpetual, irrevocable, royalty-free basis to BMJ Publishing Group Ltd ("BMJ") its licensees and where the relevant Journal is co-owned by BMJ to the co-owners of the Journal, to publish the Work in this journal and any other BMJ products and to exploit all rights, as set out in our [licence](#).

The Submitting Author accepts and understands that any supply made under these terms is made by BMJ to the Submitting Author unless you are acting as an employee on behalf of your employer or a postgraduate student of an affiliated institution which is paying any applicable article publishing charge ("APC") for Open Access articles. Where the Submitting Author wishes to make the Work available on an Open Access basis (and intends to pay the relevant APC), the terms of reuse of such Open Access shall be governed by a Creative Commons licence – details of these licences and which [Creative Commons](#) licence will apply to this Work are set out in our licence referred to above.

Other than as permitted in any relevant BMJ Author's Self Archiving Policies, I confirm this Work has not been accepted for publication elsewhere, is not being considered for publication elsewhere and does not duplicate material already published. I confirm all authors consent to publication of this Work and authorise the granting of this licence.

1  
2  
3  
4  
5  
6  
7  
8 **Consequences of health condition labelling: protocol for a systematic scoping review**  
9

10  
11  
12  
13  
14  
15  
16  
17  
18 Rebecca Sims<sup>1</sup>, Luise Kazda<sup>2</sup>, Zoe A Michaleff<sup>1</sup>, Paul Glasziou<sup>1</sup>, Rae Thomas<sup>1</sup>  
19  
20  
21  
22  
23  
24  
25  
26

27 <sup>1</sup>Institute for Evidence-Based Healthcare (IEBH), Bond University

28  
29 <sup>2</sup>Sydney School of Public Health, Faculty of Medicine and Health, The University of Sydney  
30  
31  
32  
33  
34  
35

36 Corresponding author: Rebecca Sims, Institute for Evidence-Based Healthcare (IEBH), Bond  
37 University, 14 University Drive, Robina QLD 4226. Email: [rsims@bond.edu.au](mailto:rsims@bond.edu.au)  
38  
39  
40  
41  
42

43 *Keywords: labelling; diagnosis; consequences*  
44  
45  
46  
47  
48  
49  
50  
51  
52  
53  
54  
55  
56  
57  
58  
59  
60

Word Count: 1908

## ABSTRACT

**Introduction.** When health conditions are labelled it is often to classify and communicate a set of symptoms. While diagnostic labelling can provide explanation for an individual's symptoms, it can also impact how individuals and others view those symptoms. Despite existing research regarding the effects of labelling health conditions, a synthesis of these effects has not occurred. We will conduct a systematic scoping review to synthesise the reported consequences and impact of being given a label for a health condition from an individual, societal and health practitioner perspective and explore in what context labelling of health conditions is considered important.

**Methods and analysis.** The review will adhere to the Joanna Briggs Methodology for Scoping Reviews. Searches will be conducted in five electronic databases (PubMed, Embase, PsychINFO, Cochrane, CINAHL). Reference lists of included studies will be screened and forward and backward citation searching of included articles will be conducted. We will include reviews and original studies which describe the consequences for individuals labelled with a non-cancer health condition. We will exclude hypothetical research designs and studies focussed on the consequences of labelling cancer conditions, intellectual disabilities, and/or social attributes. We will conduct thematic analyses for qualitative data and descriptive or meta-analyses for quantitative data where appropriate.

**Ethics and Dissemination.** Ethical approval is not required for a scoping review. Results will be disseminated via publication in a peer-reviewed journal, conference presentations, and lay-person summaries on various online platforms. Findings from this systematic scoping review will identify gaps in current understanding of how, when, why, and for whom a diagnostic label is important and inform future research.

### Strengths and limitations of this study

- Synthesis of the consequences of labelling of health conditions individual, practitioner and societal perspectives.
- Provision of real-world perspective of the true consequences of diagnostic labels.
- A broad, systematic search strategy, informed by preliminary public sampling, will be conducted in 5 electronic databases.
- Robust methodology will be used to identify articles for inclusion in this review (i.e. two authors will screen titles, extract data and assess methodological quality for each included article).
- Results of this review will enable the identification of gaps in current understanding of how, when, why, and for whom a diagnostic label is important and inform future research.

## INTRODUCTION

The diagnosis of physical and psychological health conditions is increasing in prevalence.<sup>1-5</sup> Diagnoses often occur in the context of individuals seeking to identify and treat symptoms. However, diagnoses can also occur as a result of screening tests where individuals have no discernible signs or symptoms of disease (such as when a routine test determines an individual has hypertension),<sup>6</sup> from unanticipated findings in investigations for other health concerns (such as identifying an anomaly in a person's thyroid when conducting an MRI of the spine),<sup>7</sup> or, when people are newly diagnosed with a health condition because of changes to diagnostic thresholds or cut-offs for the condition opposed to changes in individual circumstances (such as for gestational diabetes).<sup>1</sup> The value of a diagnosis, particularly in these latter contexts, is not always evident and the risk of over- and mis-diagnosis is significant.<sup>1 8 9</sup>

Diagnostic labels provide healthcare professionals with a framework from which to organise and interpret clinical symptom presentations, support clinical decision making through directing treatment decisions, and provide information on possible condition course and overall prognosis.<sup>10 11</sup> Further, diagnostic labels allow clinicians to assume homogeneity amongst members of patient groups, in addition to providing an efficient method for health professionals to communicate.<sup>12</sup>

Despite well-meaning intentions, application of diagnostic labels in real-world practice can be problematic. Diagnostic criteria can often be ambiguous. For example, symptoms of anxiety, such as restlessness, fatigue, or difficulty concentrating, may be explained by diagnoses of anxiety, depressive, or bipolar and related disorders.<sup>13 14</sup> Similarly, chest pain symptoms may be explained by several alternative diagnostic categories such as inflammatory diseases, musculoskeletal conditions, or coronary diseases.<sup>15 16</sup> Lastly, non-

1  
2  
3 specific low back pain is the leading cause of disability worldwide, yet for the majority of  
4  
5 people no pathoanatomical cause can be identified.<sup>17</sup>  
6  
7

8 From the perspective of a patient, a diagnostic label can have a significant impact  
9  
10 (negative and positive) on their health outcomes, psychological wellbeing, and behaviour,  
11  
12 and can influence how they are viewed and managed by healthcare professionals and are  
13  
14 perceived by other members in society (e.g. school, workplace).<sup>3 5 18</sup> In a cohort of over  
15  
16 33,000 adults', individuals who were aware that they had hypertension reported elevated  
17  
18 levels of psychological distress compared to those individuals who had hypertension,  
19  
20 however, were unaware of this.<sup>3</sup> A study investigating the impact of labelling borderline  
21  
22 personality disorder on clinician interpretation of patient symptoms found clinician's prior  
23  
24 awareness of a diagnosis of borderline personality disorder, compared to no awareness,  
25  
26 resulted in a tendency to frame observations of the individual in terms of the label, and a  
27  
28 failure to observe positive behaviours.<sup>12</sup>  
29  
30  
31  
32

33 Conversely, a diagnostic label may have positive effects on the individual. These  
34  
35 include timely referral to necessary healthcare which, in turn, can reduce morbidity and  
36  
37 mortality, improve predictions regarding condition progression as well as facilitate access to  
38  
39 support, services and resources (for example diagnosis based school funding<sup>19 20</sup> and social  
40  
41 support<sup>5</sup>) and provide an explanation and validation of an individuals' signs and symptoms.  
42  
43 A recent study exploring the impact of chronic fatigue syndrome using hypothetical scenarios  
44  
45 of a close friend's diagnosis, reported a label of chronic fatigue, compared with no label,  
46  
47 elicited higher sympathetic responses from participants, greater potential social support, and  
48  
49 greater support for active treatment.<sup>5</sup>  
50  
51  
52  
53

54 The terms used to describe a diagnostic label have been found to influence an  
55  
56 individuals' behaviour, psychological well-being and treatment preferences. Specifically, a  
57  
58 diagnostic label that uses medicalised and precise terminology compared with a description  
59  
60



1  
2  
3 of symptoms, has been found to result in higher patient anxiety, greater perceived severity of  
4 the condition and a patient preference of more invasive treatments.<sup>18 21-23</sup> This has been  
5 evidenced in conditions including gastro-oesophageal reflux disease, polycystic ovary  
6 syndrome, bone fracture, and low back pain.<sup>18 21-23</sup> Similarly, research suggests that patients  
7 diagnosed with diabetes demonstrate a propensity to medical interventions, including insulin  
8 use, oral medication taking, and blood glucose monitoring, compared to less invasive  
9 interventions, such as changes to diet and exercise practices.<sup>24</sup> The use of a medicalised label  
10 over a descriptive label for a health condition is also suggested to result in increased  
11 confidence in the medical professional and greater adoption of sick role behaviour.<sup>25</sup>  
12 Alternatively, use of descriptive labels for health conditions was found to be associated with  
13 greater patient ownership of the condition.<sup>25</sup>

14  
15  
16  
17  
18  
19  
20  
21  
22  
23  
24  
25  
26  
27  
28  
29  
30  
31  
32  
33  
34  
35  
36  
37  
38  
39  
40  
41  
42  
43  
44  
45  
46  
47  
48  
49  
50  
51  
52  
53  
54  
55  
56  
57  
58  
59  
60

To date, our understanding of the consequences and impacts of a diagnostic label has been limited to a single perspective (e.g. patient, health care practitioner), single condition (e.g. gastro-oesophageal reflux disease), or restricted to a specific study design (e.g. hypothetical research design) and a comprehensive synthesis of this information across health conditions is lacking.<sup>26 27</sup> Further, exploring the real world impact of a diagnostic label including benefits and harms has received little attention.<sup>22 28 29</sup> Therefore, the aims of this systematic scoping review are to systematically review original and synthesised research exploring the consequences of being given a label for a health condition to:

1. Identify the range of potential consequences of labelling of health conditions from an individual, societal, and health practitioner viewpoint;
2. Explore why, for whom, and in what contexts labelling of health conditions is, or is not, influential; and,
3. Evaluate the methods used to study the impact of labelling health conditions.

## METHODS AND ANALYSIS

Scoping reviews are suggested as an alternative to systematic reviews, allowing for a broader examination and synthesis of existing research and identification of research gaps.<sup>30</sup> The proposed systematic scoping review will adhere to the Joanna Briggs Methodology for Scoping Reviews,<sup>31</sup> and adhere to the Preferred Reporting Items for Systematic Reviews and Meta-Analyses Extension for Scoping Reviews (PRISMA-ScR).<sup>32</sup> This approach was selected to allow sufficient documentation of the review process.

### Consumer involvement in scoping review design and framework development

A convenience sampling survey was conducted to explore the public's opinion of the consequences of diagnostic label for health conditions. In April 2019, we posted the questions “What are the labelling consequences of being given a health diagnosis? We’re working up a list and so far we have: anxiety, relief, more tests, stigma, medico-legal problems. What else?” on two social media platforms, Facebook and Twitter. Responses on Facebook included 14 comments from six individuals, while Twitter responses resulted in 45 comments from 40 individuals. The results of this survey were used to inform the development of the search strategy, inclusion and exclusion criteria, data extraction form, and an initial qualitative framework (Table 1) that will be used in this scoping review.

Table 1. Coding Framework of Social Media Responses.

| Name                 | Description                       | Examples                                                                                                                                                                                                                                                     |
|----------------------|-----------------------------------|--------------------------------------------------------------------------------------------------------------------------------------------------------------------------------------------------------------------------------------------------------------|
| Psychological Impact | Psychological impact of diagnosis | <ul style="list-style-type: none"> <li>- Increased self-understanding</li> <li>- Stigma (internalised stigma (self); perceived stigma from others)</li> <li>- Increased psychological distress (anxiety, depression, phobia, worry, fear, stress)</li> </ul> |

|    |             |                                                 |                                                                                                                                                                                                                       |
|----|-------------|-------------------------------------------------|-----------------------------------------------------------------------------------------------------------------------------------------------------------------------------------------------------------------------|
| 1  | Support     | Support gained or loss as a result of diagnosis | <ul style="list-style-type: none"> <li>- Support groups: Increased support of others with similar diagnosis; network with other patients</li> <li>- Others less respectful, more withdrawn and judgemental</li> </ul> |
| 2  | Development | Education                                       | <ul style="list-style-type: none"> <li>- Increase in health literacy due to motivation to find about treatment options</li> </ul>                                                                                     |
| 3  |             | Planning                                        | <ul style="list-style-type: none"> <li>- Ability to plan – even if there may not be treatment, provides opportunity to get affairs in order (e.g. wills).</li> </ul>                                                  |
| 4  | Lifestyle   | Behaviour                                       | <ul style="list-style-type: none"> <li>- Change diet</li> <li>- Change lifestyle</li> </ul>                                                                                                                           |
| 5  |             | Employment                                      | <ul style="list-style-type: none"> <li>- More Sick days; Time off work; absenteeism</li> </ul>                                                                                                                        |
| 6  |             | Financial                                       | <ul style="list-style-type: none"> <li>- Diagnosis provides access to funds (e.g. Medicare, NDIS, insurance)</li> </ul>                                                                                               |
| 7  | Service Use | Testing                                         | <ul style="list-style-type: none"> <li>- Seeking more investigations</li> <li>- Scans and imaging</li> <li>- Encourages screening of other family members at low-risk of the condition</li> </ul>                     |
| 8  |             | Treatment                                       | <ul style="list-style-type: none"> <li>- Clear Treatment path; clearer treatment protocols</li> <li>- Side-effects (of medication sexual, agitation, suicidality, emotional numbing)</li> </ul>                       |
| 9  |             |                                                 |                                                                                                                                                                                                                       |
| 10 |             |                                                 |                                                                                                                                                                                                                       |
| 11 |             |                                                 |                                                                                                                                                                                                                       |
| 12 |             |                                                 |                                                                                                                                                                                                                       |
| 13 |             |                                                 |                                                                                                                                                                                                                       |
| 14 |             |                                                 |                                                                                                                                                                                                                       |
| 15 |             |                                                 |                                                                                                                                                                                                                       |
| 16 |             |                                                 |                                                                                                                                                                                                                       |
| 17 |             |                                                 |                                                                                                                                                                                                                       |
| 18 |             |                                                 |                                                                                                                                                                                                                       |
| 19 |             |                                                 |                                                                                                                                                                                                                       |
| 20 |             |                                                 |                                                                                                                                                                                                                       |
| 21 |             |                                                 |                                                                                                                                                                                                                       |
| 22 |             |                                                 |                                                                                                                                                                                                                       |
| 23 |             |                                                 |                                                                                                                                                                                                                       |
| 24 |             |                                                 |                                                                                                                                                                                                                       |
| 25 |             |                                                 |                                                                                                                                                                                                                       |
| 26 |             |                                                 |                                                                                                                                                                                                                       |
| 27 |             |                                                 |                                                                                                                                                                                                                       |
| 28 |             |                                                 |                                                                                                                                                                                                                       |
| 29 |             |                                                 |                                                                                                                                                                                                                       |
| 30 |             |                                                 |                                                                                                                                                                                                                       |
| 31 |             |                                                 |                                                                                                                                                                                                                       |
| 32 |             |                                                 |                                                                                                                                                                                                                       |
| 33 |             |                                                 |                                                                                                                                                                                                                       |
| 34 |             |                                                 |                                                                                                                                                                                                                       |
| 35 |             |                                                 |                                                                                                                                                                                                                       |
| 36 |             |                                                 |                                                                                                                                                                                                                       |
| 37 |             |                                                 |                                                                                                                                                                                                                       |
| 38 |             |                                                 |                                                                                                                                                                                                                       |
| 39 |             |                                                 |                                                                                                                                                                                                                       |
| 40 |             |                                                 |                                                                                                                                                                                                                       |
| 41 |             |                                                 |                                                                                                                                                                                                                       |
| 42 |             |                                                 |                                                                                                                                                                                                                       |
| 43 |             |                                                 |                                                                                                                                                                                                                       |
| 44 |             |                                                 |                                                                                                                                                                                                                       |
| 45 |             |                                                 |                                                                                                                                                                                                                       |
| 46 |             |                                                 |                                                                                                                                                                                                                       |
| 47 |             |                                                 |                                                                                                                                                                                                                       |
| 48 |             |                                                 |                                                                                                                                                                                                                       |
| 49 |             |                                                 |                                                                                                                                                                                                                       |
| 50 |             |                                                 |                                                                                                                                                                                                                       |
| 51 |             |                                                 |                                                                                                                                                                                                                       |
| 52 |             |                                                 |                                                                                                                                                                                                                       |
| 53 |             |                                                 |                                                                                                                                                                                                                       |
| 54 |             |                                                 |                                                                                                                                                                                                                       |
| 55 |             |                                                 |                                                                                                                                                                                                                       |
| 56 |             |                                                 |                                                                                                                                                                                                                       |
| 57 |             |                                                 |                                                                                                                                                                                                                       |
| 58 |             |                                                 |                                                                                                                                                                                                                       |
| 59 |             |                                                 |                                                                                                                                                                                                                       |
| 60 |             |                                                 |                                                                                                                                                                                                                       |

### Inclusion criteria

Peer reviewed publications including, systematic or literature reviews and original studies which describe the perceived consequences for individuals labelled with a non-cancer health condition will be included. Perceived consequences can be reported from the perspectives of the individuals, their family, friends, and/or carers, or health professionals. As we expect individuals labelled as having a cancer condition will have different experiences to those labelled with general health conditions, studies that focus on these samples are excluded. Similarly, studies that report the consequence of labels for people using hypothetical case scenarios, or individuals with intellectual disabilities and/or social attributes such as race, sexual identity or orientation will also be excluded (see Table 2 for more details).

Table 2. Inclusion Criteria

| Aspect           | Inclusion Criteria                                                                                                                                                                                                                                         | Exclusion Criteria                                                                                                                                                                                         |
|------------------|------------------------------------------------------------------------------------------------------------------------------------------------------------------------------------------------------------------------------------------------------------|------------------------------------------------------------------------------------------------------------------------------------------------------------------------------------------------------------|
| Types of studies | Original Studies (Cohort, Case-Controlled, Cross-Sectional, Observational, RCT, Focus Groups)*<br>Synthesised Studies (Systematic Reviews)<br><i>*Studies utilising qualitative methodologies do not require multiple group comparisons for inclusion.</i> | Protocols (final study to be sourced)<br>Opinion pieces and commentaries<br>Quantitative Cohort, Case-Controlled, and Cross-Sectional studies without comparator<br>Hypothetical or vignette based studies |

|              |                                                                                                                                                                                                                                                                                                                                                  |                                                                                                                                                                                                                                                                                                                                                                                                         |
|--------------|--------------------------------------------------------------------------------------------------------------------------------------------------------------------------------------------------------------------------------------------------------------------------------------------------------------------------------------------------|---------------------------------------------------------------------------------------------------------------------------------------------------------------------------------------------------------------------------------------------------------------------------------------------------------------------------------------------------------------------------------------------------------|
| Participants | Individuals, no age limit (e.g. adults, children, family, carers, health professionals, general public)                                                                                                                                                                                                                                          | Animal subjects                                                                                                                                                                                                                                                                                                                                                                                         |
| Condition    | <p>Screening and/or labelling of physical or psychological health condition/s</p> <p>Self-reported (e.g. response to questions such as “has your GP ever told you that you have hypertension?”)</p> <p>Health condition confirmed (e.g. medical examination and testing completed as part of the study)</p>                                      | <p>Labelling of intellectual impairment, race, ethnicity, sexual identity or sexual orientation</p> <p>Labelling of cancers and cancer related conditions</p> <p>Self-reported conditions provided by unqualified professional (e.g. physiotherapist telling patient they have hypertension)</p> <p>Self-identified conditions (e.g. googling of symptoms, no confirmation by medical professional)</p> |
| Outcomes     | <p>Consequences, impact, effects of the health condition label or diagnosis</p> <p>Perceived harms and/or benefits (e.g. illness burden)</p> <ul style="list-style-type: none"> <li>- Lived experience</li> <li>- Psychological impact (e.g. anxiety, quality of life)</li> <li>- Behaviour change (e.g. participation in employment)</li> </ul> | <p>Effect of the health condition (e.g. disease mechanisms/traits)</p> <p>Gene labelling</p> <p>Food or nutrition labelling</p> <p>Drug effects/effectiveness</p> <p>Intervention effects/effectiveness (e.g. intervention A vs intervention B)</p>                                                                                                                                                     |

|          |                                            |   |
|----------|--------------------------------------------|---|
|          | - Support (e.g. financial, social support) |   |
| Language | No language limitations                    | - |
| Date     | No date limitations                        | - |

### Search strategy

A structured search, developed in collaboration with an information specialist, of five electronic databases (PubMed, Embase, PsychINFO, Cochrane, CINAHL) will be conducted to identify relevant publications. Databases will be searched from their inception. Reference lists of included articles will be searched and forward citation searching of included articles will be conducted. The full search strategy to be used is reported in the Supplementary Material.

### Study selection

Titles and abstracts of 10% of articles retrieved through electronic and manual searches will be independently screened by two reviewers (RS and LK) for eligibility against the pre-specified inclusion criteria. Disagreements will be resolved through discussion and consultation with additional reviewers as required. When interrater reliability of 0.9 or above is achieved for the screened studies, remaining studies will continue to be screened by one reviewer (RS). Articles identified as unclear for inclusion will be reviewed by an additional reviewer as required.

### Data extraction

Full text publications will be obtained for any potentially relevant studies and will be screened for inclusion against the same inclusion criteria by one reviewer (RS). Additional

1  
2  
3 uncertainties regarding eligibility for inclusion will be resolved through discussion with two  
4  
5 other reviewers (RT and PG). Two reviewers (RS and ZAM) will independently extract  
6  
7 study meta-data and quantitative data from 10% of included studies using a standardised data  
8  
9 extraction form in Microsoft Excel that will be piloted prior to full-text data extraction.  
10  
11

12  
13 These same reviewers will also extract qualitative data from 10% of studies using  
14  
15 NVivo version 12. Conflicts will be resolved by a third party as required. When interrater  
16  
17 reliability of 0.9 or above is achieved for extracted data, one reviewer (RS) will continue to  
18  
19 extract data for the remaining included studies. Queries will be resolved through discussion  
20  
21 with a second reviewer (ZAM). Extracted data will include study characteristics (author,  
22  
23 journal, year of publication, study country and setting), participant characteristics (number of  
24  
25 participants, age, health condition), and outcomes (consequences, impact, effects of the  
26  
27 diagnostic label). For studies with quantitative measures, extracted data will include, but is  
28  
29 not limited to, validated and unvalidated measures (for example, Short Form Health Survey  
30  
31 (SF-36)<sup>33</sup>, or General Health Questionnaire (GHQ)<sup>34</sup>). For qualitative studies, we will extract  
32  
33 reported themes and supporting quotes provided.  
34  
35  
36  
37  
38  
39

#### 40 **Study quality**

41  
42 Study quality will be assessed using appraisal tools appropriate for the designs  
43  
44 identified, for example, the McGill Mixed Methods Critical Appraisal Tool (MMAT)<sup>35</sup> will  
45  
46 be used for original studies and Assessing the Methodological Quality of Systematic  
47  
48 Reviews, version 2 (AMSTAR-2)<sup>36</sup> will be used for systematic reviews. The former critical  
49  
50 appraisal tool has been developed for evaluating original studies utilising qualitative,  
51  
52 quantitative, or mixed methodologies, while the latter tool was developed for appraising the  
53  
54 quality of systematic reviews which include randomised or non-randomised studies. Quality  
55  
56 assessment will be conducted independently by two authors (RS and ZAM) for 10% of the  
57  
58  
59  
60

1  
2  
3 included studies. Conflicts will be resolved through discussion or by a third reviewer, as  
4  
5 necessary.  
6  
7  
8  
9

## 10 **PRESENTATION OF RESULTS**

11  
12 We will present study selection in a flow diagram according to PRISMA-Scr and  
13 included studies will be described in a table of characteristics.<sup>32</sup> Results will be aggregated as  
14 appropriate. Results pertinent to the consequences of labelling of health conditions will be  
15 collated to expand those provided in Table 1, with empirical data regarding rate and severity  
16 of these consequences also examined. Additionally, a compendium of methods used to elicit  
17 consequences of health condition labelling will be developed and methodology appraised.  
18 For quantitative studies, extracted data will be tabulated in a descriptive and/or statistical  
19 manner depending on the availability of data (i.e. number of studies reporting similar  
20 outcome measures or measurement of similar constructs, such as quality of life or symptoms  
21 of anxiety) and degree of heterogeneity between studies (e.g. population, clinical conditions).  
22 Should data not support a meta-analysis, results from studies which provide quantitative data  
23 will be reported in a narrative synthesis and interpreted alongside results from qualitative  
24 studies. Qualitative data will be analysed using developed frameworks (see Table 1), and  
25 following established protocols for the qualitative analysis of information in the social  
26 sciences.<sup>37</sup> The characteristics and results of all included studies will be reported in tables  
27 and summarised in text.  
28  
29  
30  
31  
32  
33  
34  
35  
36  
37  
38  
39  
40  
41  
42  
43  
44  
45  
46  
47  
48  
49  
50

### 51 **Ethics and Dissemination**

52 As the current study is a systematic scoping review protocol, ethics is not required.  
53  
54 Dissemination of results will be made public via peer-reviewed publications, conference  
55  
56  
57  
58  
59  
60



1  
2  
3 presentations and lay-person summaries on various on-line platforms (e.g. The  
4  
5 Conversation).  
6  
7  
8  
9  
10  
11  
12  
13  
14  
15  
16  
17  
18  
19  
20  
21  
22  
23  
24  
25  
26  
27  
28  
29  
30  
31  
32  
33  
34  
35  
36  
37  
38  
39  
40  
41  
42  
43  
44  
45  
46  
47  
48  
49  
50  
51  
52  
53  
54  
55  
56  
57  
58  
59  
60

For peer review only

## REQUIRED STATEMENTS

**Twitter:** Rebecca Sims @BecSims90, Luise Kazda @LuiseKazda, Zoe A Michaleff @ZoeMichaleff, Paul Glasziou @PaulGlasziou, Rae Thomas @rthomasEBP

**Acknowledgements:** The authors thank Justin Clark, Senior Research Information Specialist at the Institute for Evidence-Based Healthcare, Bond University for assistance with constructing the search strategy.

**Author Contributions:** RS, PG, and RT contributed to the conception and design of the protocol, initial public ‘survey’ and construction of the search terms. RS, LK, and ZAM contributed to screening and data analysis. RS, ZAM, RT, and PG contributed to the drafting of the manuscript and all authors approved the final version.

**Funding:** RS is supported by an Australian Government Research Training Program Scholarship. RT and ZAM are supported by a National Health and Medical Research Council Program grant (#1106452). LK is supported by a Centres of Research Excellence Grant (#1104136). PG is supported by a NHMRC Research Fellowship (#1080042). The funding sources have no role in study design, data collection, data analysis, data interpretation, or writing of the report.

**Competing Interests:** None declared.

**Patient consent for publication:** Not required.

**Orcid iDs:** Rebecca Sims <https://orcid.org/0000-0002-1604-8354>  
Luise Kazda <http://orcid.org/0000-0003-4105-0402>  
Zoe A Michaleff <https://orcid.org/0000-0002-0360-4956>  
Paul Glasziou <https://orcid.org/0000-0001-7564-073X>  
Rae Thomas <http://orcid.org/0000-0002-2165-5917>

## REFERENCES

1. Sexton H, Heal C, Banks J, Braniff K. Impact of new diagnostic criteria for gestational diabetes. *J Obstet Gynaecol Res* 2018;44:425-31. doi: 10.1111/jog.13544.
2. Australian Bureau of Statistics. National Health Survey: First Results, 2017-18. Web site: <https://www.abs.gov.au/ausstats/abs@.nsf/mf/4364.0.55.001>. Updated May 27, 2019. Accessed November 30, 2019.
3. Hamer M, Batty GD, Stamatakis E, Kivimaki M. Hypertension awareness and psychological distress. *Hypertens* 2010;56:547-50. doi: 10.1161/hypertensionaha.110.153775.
4. Thombs BD, Kwakkenbos L, Levis AW, Benedetti A. Addressing overestimation of the prevalence of depression based on self-report screening questionnaires. *Can Med Assoc J* 2018;190:E44. doi: 10.1503/cmaj.170691.
5. Noble S, Bonner C, Hersch J, Jansen J, McGeechan K, McCaffery K. Could disease labelling have positive effects? An experimental study exploring the effect of the chronic fatigue syndrome label on intended social support. *Patient Educ Couns* 2019;102:486-93. doi: 10.1016/j.pec.2018.10.011.
6. Walker MJ, Rogers WA. Diagnosis, narrative identity, and asymptomatic disease. *Theor Med Bioeth* 2017;38:307-21. doi: 10.1007/s11017-017-9412-1.
7. Hiremath SB, Boto J, Regnaud A, Etienne L, Fitsiori A, Vargas MI. Incidentalomas in spine and spinal cord imaging. *Clin Neuroradiol* 2019;29:191-213. doi: 10.1007/s00062-019-00773-5.
8. Doust J, Glasziou P. Is the problem that everything is a diagnosis? *Aust Fam Physician* 2013;42:856-9.
9. Brodersen J, Schwartz LM, Heneghan C, O'Sullivan JW, Aronson JK, Woloshin S. Overdiagnosis: what it is and what it isn't. *BMJ Evid Based Med* 2018;23:1-3. doi: 10.1136/ebmed-2017-110886.
10. Frances A, First M, Pincus HA, Widiger T, Davis W. An introduction to DSM-IV. *Hosp Community Psychiatry* 1990;41:493-95.
11. Croft P, Altman DG, Deeks JJ, et al. The science of clinical practice: disease diagnosis or patient prognosis? Evidence about "what is likely to happen" should shape clinical practice. *BMC Med* 2015;13:20. doi: 10.1186/s12916-014-0265-4.
12. Lam DC, Poplavskaya EV, Salkovskis PM, Hogg LI, Panting H. An experimental investigation of the impact of personality disorder diagnosis on clinicians: can we see past the borderline? *Behav Cogn Psychother* 2016;44:361-73. doi: 10.1017/s1352465815000351.
13. Allsopp K, Read J, Corcoran R, Kinderman P. Heterogeneity in psychiatric diagnostic classification. *Psychiatry Res* 2019;279:15-22. doi: 10.1016/j.psychres.2019.07.005
14. American Psychological Association. *Diagnostic and Statistical Manual for Mental Disorders, Fifth Edition*. Washington, D.C.: American Psychiatric Association, 2013.
15. Christiansen J. Less is more: chest pain pathways in clinical care. *Med J Aust* 2017;207:193-94. doi: 10.5694/mja17.00331
16. Sturm C, Witte T. Musculoskeletal-related chest pain. *Der Internist* 2017;58:39-46. doi: 10.1007/s00108-016-0166-z.
17. Hartvigsen J, Hancock MJ, Kongsted A, et al. What low back pain is and why we need to pay attention. *Lancet* 2018;391:2356-67. doi: 10.1016/s0140-6736(18)30480-x.
18. Scherer LD, Zikmund-Fisher BJ, Fagerlin A, Tarini BA. Influence of "GERD" label on parents' decision to medicate infants. *Pediatr* 2013;131:839-45. doi: 10.1542/peds.2012-3070.

19. Parliament of Australia. Access to real learning: the impact of policy, funding and culture on students with disability. [https://www.aph.gov.au/Parliamentary\\_Business/Committees/Senate/Education\\_and\\_Employment/students\\_with\\_disability/Report](https://www.aph.gov.au/Parliamentary_Business/Committees/Senate/Education_and_Employment/students_with_disability/Report). Published 2016. Accessed November 30, 2019.
20. Witham M. Funding the need not the label. Presented at: AARE Conference; 2015; Western Australia, Australia.
21. Nickel B, Barratt A, Copp T, Moynihan R, McCaffery K. Words do matter: a systematic review on how different terminology for the same condition influences management preferences. *BMJ Open* 2017;7:e014129. doi: 10.1136/bmjopen-2016-014129.
22. Copp T, McCaffery K, Azizi L, Doust J, Mol BWJ, Jansen J. Influence of the disease label 'polycystic ovary syndrome' on intention to have an ultrasound and psychosocial outcomes: a randomised online study in young women. *Hum Reprod* 2017;32:876-84. doi: 10.1093/humrep/dex029.
23. O'Keefe M. Do different diagnostic labels for low back pain influence management preferences: an online randomised controlled study. Presented at: Preventing Overdiagnosis Conference; December 5, 2019; Sydney, Australia.
24. Kavookjian J, Berger BA, Grimley DM, Villaume WA, Anderson HM, Barker KN. Patient decision making: strategies for diabetes diet adherence intervention. *Res Social Adm Pharm* 2005;1:389-407. doi: 10.1016/j.sapharm.2005.06.006.
25. Ogden J, Branson R, Bryett A, et al. What's in a name? An experimental study of patients' views of the impact and function of a diagnosis. *Fam Pract* 2003;20:248-53.
26. Macdonald LA, Sackett DL, Haynes RB, Taylor DW. Labelling in hypertension: A review of the behavioural and psychological consequences. *J Chronic Dis* 1984;37:933-42. doi: 10.1016/0021-968190070-5.
27. Cotter AR, Vuong K, Mustelin LL, et al. Do psychological harms result from being labelled with an unexpected diagnosis of abdominal aortic aneurysm or prostate cancer through screening? A systematic review. *BMJ Open* 2017;7:e017565. doi: 10.1136/bmjopen-2017-017565.
28. Betsch TA, Gorodzinsky AY, Finley GA, et al. What's in a name? Health care providers' perceptions of pediatric pain patients based on diagnostic labels. *Clin J Pain* 2017;33:694-98. doi: 10.1097/ajp.0000000000000454.
29. Lancaster AM. *Impact of diagnostic versus emotional disturbance label on preservice teacher expectations of student academic, behavior, and social outcomes* [PhD Thesis]. Mississippi: Mississippi State University; 2016.
30. Arksey H, O'Malley L. Scoping studies: towards a methodological framework. *Int J Soc Res Methodol* 2005;8:19-32. doi: 10.1080/1364557032000119616.
31. Peters M, Godfrey C, McInerney P, Soares CB, Khalil H, Parker D. In: Aromataris E, Munn Z, eds. *Joanna Briggs Institute review's manual*. The Joanna Briggs Institute, 2017.
32. Tricco AC, Lillie E, Zarin W, et al. PRISMA extension for scoping reviews (PRISMA-ScR): checklist and explanation. *Ann Intern Med* 2018;169:467-73.
33. Ware JE, Sherbourne CD. The MOS 36-item short-form health survey (SF-36): conceptual framework and item selection. *Med care* 1992;30:473-83.
34. Goldberg D, Williams P. *A User's Guide to the General Health Questionnaire*. Windsor, Berks: NFER-Nelson. 1988.
35. Hong Q, Fabregues S, Bartlett G, et al. The Mixed Methods Appraisal Tool (MMAT) version 2018 for information professionals and researchers. *Educ Inf* 2018;34:285-291. doi: 10.3233/EFI-180221.

- 1  
2  
3 36. Shea BJ, Reeves BC, Wells G, et al. AMSTAR 2: a critical appraisal tool for systematic  
4 reviews that include randomised or non-randomised studies of healthcare  
5 interventions, or both. *BMJ* 2017;358:j4008. doi: 10.1136/bmj.j4008.  
6  
7 37. Ritchie J, Lewis J, McNaughton Nicholls C, Ormston R, eds. *Qualitative Research*  
8 *Practice: A Guide for Social Science Students and Researchers*. 2nd ed. London, UK:  
9 Sage Publications Ltd. 2014.  
10  
11  
12  
13  
14  
15  
16  
17  
18  
19  
20  
21  
22  
23  
24  
25  
26  
27  
28  
29  
30  
31  
32  
33  
34  
35  
36  
37  
38  
39  
40  
41  
42  
43  
44  
45  
46  
47  
48  
49  
50  
51  
52  
53  
54  
55  
56  
57  
58  
59  
60

For peer review only

Supplementary Material  
Search Strategies

**PubMed**

(Health[tiab] OR Illness[tiab] OR Disorder[tiab] OR Condition[tiab] OR Disease[tiab])

AND

((Psychological[ti] OR Label[tiab] OR Labelling[tiab] OR Labeling[tiab]) AND  
(Diagnosis[tiab] OR Diagnostic[tiab] OR Screening[Mesh] OR Screening[tiab] OR  
Screened[tiab]))

AND

(Patient[tiab] OR Patients[tiab] OR Individuals[tiab] OR Self[tiab] OR Parent[tiab] OR  
Family[tiab] OR Adult[tiab] OR Men[tiab] OR Women[tiab])

AND

(Attitude[Mesh] OR Awareness[tiab] OR Stigma[tiab] OR Beliefs[tiab] OR Well-being[tiab]  
OR Wellbeing[tiab] OR Meaning[tiab] OR Impact[tiab] OR Effect[tiab] OR Effects[tiab] OR  
Influence[tiab] OR Experience[tiab])

AND

("Systematic review"[tiab] OR "Systematic Review"[pt] OR "Cochrane Database Syst  
Rev"[ta] OR "meta analysis"[pt] OR "meta analysis"[tiab] OR ((Search[tiab] OR  
Searched[tiab] OR Searches[tiab]) AND (PubMed[tiab] OR Medline[tiab] OR Database[tiab]  
OR Databases[tiab])) OR "randomized controlled trial"[pt] OR "controlled clinical trial"[pt]  
OR randomized[tiab] OR randomised[tiab] OR placebo[tiab] OR randomly[tiab] OR  
trial[tiab] OR groups[tiab] OR "Epidemiologic Studies"[Mesh] OR "case-control  
studies"[Mesh] OR "Cohort Studies"[Mesh] OR "case control"[tiab] OR Cohort[tiab] OR  
"Follow up"[tiab] OR Observational[tiab] OR Longitudinal[tiab] OR Prospective[tiab] OR  
retrospective[tiab] OR "cross sectional"[tiab] OR "Cross-Sectional Studies"[Mesh] OR  
Investigated[tiab] OR Analysis[tiab] OR Statistics[tiab] OR Data[tiab] OR "statistics and  
numerical data"[sh] OR "epidemiology"[sh])

NOT

(Animals[Mesh] NOT (Animals[Mesh] AND Humans[Mesh]))

NOT

(Injections[Mesh] OR Open-Label[tiab] OR "Product Labeling"[Mesh] OR "Drug  
Labeling"[Mesh] OR "Affinity Labels"[Mesh] OR "Food Labeling"[Mesh] OR "Isotope  
Labeling"[Mesh] OR "Staining and Labeling"[Mesh] OR "In Situ Nick-End Labeling"[Mesh]  
OR "Primed In Situ Labeling"[Mesh] OR Rat[ti] OR Rats[ti] OR Mice[ti] OR Mouse[ti] OR  
Placebo[ti] OR "Drug effects"[sh] OR Drug[ti] OR Drugs[ti] OR "Food and Drug  
Administration"[ti] OR "Food labeling"[ti] OR "Calorie labeling"[ti] OR Injection[ti] OR  
Cigarette[ti])

**Embase**

1  
2  
3  
4 (((Health:ti,ab OR Illness:ti,ab OR Disorder:ti,ab OR Condition:ti,ab OR Disease:ti,ab)))  
5  
6 AND  
7 (((Psychological:ti OR Label:ti,ab OR Labelling:ti,ab OR Labeling:ti,ab) AND  
8 (Diagnosis:ti,ab OR Diagnostic:ti,ab OR Screening:ti,ab OR Screening:ti,ab OR  
9 Screened:ti,ab))))  
10  
11 AND  
12 (((Patient:ti,ab OR Patients:ti,ab OR Individuals:ti,ab OR Self:ti,ab OR Parent:ti,ab OR  
13 Family:ti,ab OR Adult:ti,ab OR Men:ti,ab OR Women:ti,ab)))  
14  
15 AND  
16 (((Attitude:ti,ab OR Awareness:ti,ab OR Stigma:ti,ab OR Beliefs:ti,ab OR Well-being:ti,ab  
17 OR Wellbeing:ti,ab OR Meaning:ti,ab OR Impact:ti,ab OR Effect:ti,ab OR Effects:ti,ab OR  
18 Influence:ti,ab OR Experience:ti,ab)))  
19  
20 AND  
21  
22 (((("Systematic review":ti,ab OR "Systematic Review":it OR "Cochrane Database Syst  
23 Rev.jn" OR "meta analysis":it OR "meta analysis":ti,ab OR ((Search:ti,ab OR Searched:ti,ab  
24 OR Searches:ti,ab) AND (PubMed:ti,ab OR Medline:ti,ab OR Database:ti,ab OR  
25 Databases:ti,ab)) OR "randomized controlled trial":it OR "controlled clinical trial":it OR  
26 randomized:ti,ab OR randomised:ti,ab OR placebo:ti,ab OR randomly:ti,ab OR trial:ti,ab OR  
27 groups:ti,ab OR "Epidemiologic Studies" OR "case-control studies" OR "Cohort Studies" OR  
28 "case control":ti,ab OR Cohort:ti,ab OR "Follow up":ti,ab OR Observational:ti,ab OR  
29 Longitudinal:ti,ab OR Prospective:ti,ab OR retrospective:ti,ab OR "cross sectional":ti,ab OR  
30 "Cross-Sectional Studies" OR Investigated:ti,ab OR Analysis:ti,ab OR Statistics:ti,ab OR  
31 Data:ti,ab OR epidemiology:ti,ab)))  
32  
33 NOT  
34  
35  
36 (((Injections OR Open-Label:ti,ab OR "Product Labeling" OR "Drug Labeling" OR "Drug  
37 Therapy" OR "Affinity Labels" OR "Food Labeling" OR "Isotope Labeling" OR "Staining  
38 and Labeling" OR "In Situ Nick-End Labeling" OR "Primed In Situ Labeling" OR Rat:ti OR  
39 Rats:ti OR Mice:ti OR Mouse:ti OR Placebo:ti OR "Drug effects.hw" OR Drug:ti OR  
40 Drugs:ti OR "Off Label":ti,ab OR Food AND "Drug Administration":ti OR "Food  
41 labeling":ti OR "Calorie labeling":ti OR Injection:ti OR Cigarette:ti)))  
42  
43  
44  
45  
46  
47  
48  
49  
50  
51  
52  
53  
54  
55  
56  
57  
58  
59  
60



**PsychINFO**

((Health.ti,ab OR Illness.ti,ab OR Disorder.ti,ab OR Condition.ti,ab OR Disease.ti,ab))

AND

((Psychological.ti OR Label.ti,ab OR Labelling.ti,ab OR Labeling.ti,ab) AND

(Diagnosis.ti,ab OR Diagnostic.ti,ab OR Screening.ti,ab OR Screening.ti,ab OR

Screened.ti,ab)))

AND

((Patient.ti,ab OR Patients.ti,ab OR Individuals.ti,ab OR Self.ti,ab OR Parent.ti,ab OR

Family.ti,ab OR Adult.ti,ab OR Men.ti,ab OR Women.ti,ab))

AND

((Attitude.ti,ab OR Awareness.ti,ab OR Stigma.ti,ab OR Beliefs.ti,ab OR Well-being.ti,ab

OR Wellbeing.ti,ab OR Meaning.ti,ab OR Impact.ti,ab OR Effect.ti,ab OR Effects.ti,ab OR

Influence.ti,ab OR Experience.ti,ab))

AND

((Systematic review.ti,ab OR Systematic Review.pt OR Cochrane Database Syst Rev.jn OR

meta analysis.pt OR meta analysis.ti,ab OR ((Search.ti,ab OR Searched.ti,ab OR

Searches.ti,ab) AND (PubMed.ti,ab OR Medline.ti,ab OR Database.ti,ab OR

Databases.ti,ab)) OR randomized controlled trial.pt OR controlled clinical trial.pt OR

randomized.ti,ab OR randomised.ti,ab OR placebo.ti,ab OR randomly.ti,ab OR trial.ti,ab OR

groups.ti,ab OR "Epidemiologic Studies" OR "case-control studies" OR "Cohort Studies" OR

case control.ti,ab OR Cohort.ti,ab OR Follow up.ti,ab OR Observational.ti,ab OR

Longitudinal.ti,ab OR Prospective.ti,ab OR retrospective.ti,ab OR cross sectional.ti,ab OR

"Cross-Sectional Studies" OR Investigated.ti,ab OR Analysis.ti,ab OR Statistics.ti,ab OR

Data.ti,ab OR epidemiology.ti,ab))

NOT

((Injections OR Open-Label.ti,ab OR "Product Labeling" OR "Drug Labeling" OR "Drug

Therapy" OR "Affinity Labels" OR "Food Labeling" OR "Isotope Labeling" OR "Staining

and Labeling" OR "In Situ Nick-End Labeling" OR "Primed In Situ Labeling" OR Rat.ti OR

Rats.ti OR Mice.ti OR Mouse.ti OR Placebo.ti OR Drug effects.hw OR Drug.ti OR Drugs.ti

OR Off Label.ti,ab OR Food and Drug Administration.ti OR Food labeling.ti OR Calorie

labeling.ti OR Injection.ti OR Cigarette.ti))

Only



**Cochrane**

(((Health:ti,ab OR Illness:ti,ab OR Disorder:ti,ab OR Condition:ti,ab OR Disease:ti,ab)))

AND

(((Psychological:ti OR Label:ti,ab OR Labelling:ti,ab OR Labeling:ti,ab) AND

(Diagnosis:ti,ab OR Diagnostic:ti,ab OR Screening:ti,ab OR Screening:ti,ab OR

Screened:ti,ab))))

AND

(((Patient:ti,ab OR Patients:ti,ab OR Individuals:ti,ab OR Self:ti,ab OR Parent:ti,ab OR

Family:ti,ab OR Adult:ti,ab OR Men:ti,ab OR Women:ti,ab)))

AND

(((Attitude:ti,ab OR Awareness:ti,ab OR Stigma:ti,ab OR Beliefs:ti,ab OR Well-being:ti,ab

OR Wellbeing:ti,ab OR Meaning:ti,ab OR Impact:ti,ab OR Effect:ti,ab OR Effects:ti,ab OR

Influence:ti,ab OR Experience:ti,ab)))

AND

((( "Systematic review":ti,ab OR "Systematic Review":pt OR "Cochrane Database Syst

Rev.jn" OR "meta analysis":pt OR "meta analysis":ti,ab OR ((Search:ti,ab OR Searched:ti,ab

OR Searches:ti,ab) AND (PubMed:ti,ab OR Medline:ti,ab OR Database:ti,ab OR

Databases:ti,ab)) OR "randomized controlled trial":pt OR "controlled clinical trial":pt OR

randomized:ti,ab OR randomised:ti,ab OR placebo:ti,ab OR randomly:ti,ab OR trial:ti,ab OR

groups:ti,ab OR "Epidemiologic Studies" OR "case-control studies" OR "Cohort Studies" OR

"case control":ti,ab OR Cohort:ti,ab OR "Follow up":ti,ab OR Observational:ti,ab OR

Longitudinal:ti,ab OR Prospective:ti,ab OR retrospective:ti,ab OR "cross sectional":ti,ab OR

"Cross-Sectional Studies" OR Investigated:ti,ab OR Analysis:ti,ab OR Statistics:ti,ab OR

Data:ti,ab OR epidemiology:ti,ab)))

NOT

(((Injections OR Open-Label:ti,ab OR "Product Labeling" OR "Drug Labeling" OR "Drug

Therapy" OR "Affinity Labels" OR "Food Labeling" OR "Isotope Labeling" OR "Staining

and Labeling" OR "In Situ Nick-End Labeling" OR "Primed In Situ Labeling" OR Rat:ti OR

Rats:ti OR Mice:ti OR Mouse:ti OR Placebo:ti OR "Drug effects.hw" OR Drug:ti OR

Drugs:ti OR "Off Label":ti,ab OR Food AND "Drug Administration":ti OR "Food

labeling":ti OR "Calorie labeling":ti OR Injection:ti OR Cigarette:ti)))

**CINAHL**

((((TI Health OR AB Health OR TI Illness OR AB Illness OR TI Disorder OR AB Disorder OR TI Condition OR AB Condition OR TI Disease OR AB Disease))))

AND

(((((TI Psychological OR TI Label OR AB Label OR TI Labelling OR AB Labelling OR TI Labeling OR AB Labeling) AND (TI Diagnosis OR AB Diagnosis OR TI Diagnostic OR AB Diagnostic OR TI Screening OR AB Screening OR TI Screening OR AB Screening OR TI Screened OR AB Screened))))))

AND

((((TI Patient OR AB Patient OR TI Patients OR AB Patients OR TI Individuals OR AB Individuals OR TI Self OR AB Self OR TI Parent OR AB Parent OR TI Family OR AB Family OR TI Adult OR AB Adult OR TI Men OR AB Men OR TI Women OR AB Women))))

AND

((((TI Attitude OR AB Attitude OR TI Awareness OR AB Awareness OR TI Stigma OR AB Stigma OR TI Beliefs OR AB Beliefs OR TI Well-being OR AB Well-being OR TI Wellbeing OR AB Wellbeing OR TI Meaning OR AB Meaning OR TI Impact OR AB Impact OR TI Effect OR AB Effect OR TI Effects OR AB Effects OR TI Influence OR AB Influence OR TI Experience OR AB Experience))))

AND

((((TI "Systematic review" OR AB "Systematic review" OR PT "Systematic Review" OR "Cochrane Database Syst Rev.jn" OR PT "meta analysis" OR TI "meta analysis" OR AB "meta analysis" OR ((TI Search OR AB Search OR TI Searched OR AB Searched OR TI Searches OR AB Searches) AND (TI PubMed OR AB PubMed OR TI Medline OR AB Medline OR TI Database OR AB Database OR TI Databases OR AB Databases)) OR PT "randomized controlled trial" OR PT "controlled clinical trial" OR TI randomized OR AB randomized OR TI randomised OR AB randomised OR TI placebo OR AB placebo OR TI randomly OR AB randomly OR TI trial OR AB trial OR TI groups OR AB groups OR "Epidemiologic Studies" OR "case-control studies" OR "Cohort Studies" OR TI "case control" OR AB "case control" OR TI Cohort OR AB Cohort OR TI "Follow up" OR AB "Follow up" OR TI Observational OR AB Observational OR TI Longitudinal OR AB Longitudinal OR TI Prospective OR AB Prospective OR TI retrospective OR AB retrospective OR TI "cross sectional" OR AB "cross sectional" OR "Cross-Sectional Studies" OR TI Investigated OR AB Investigated OR TI Analysis OR AB Analysis OR TI Statistics OR AB Statistics OR TI Data OR AB Data OR TI epidemiology OR AB epidemiology))))

NOT

((((Injections OR TI Open-Label OR AB Open-Label OR "Product Labeling" OR "Drug Labeling" OR "Drug Therapy" OR "Affinity Labels" OR "Food Labeling" OR "Isotope Labeling" OR "Staining and Labeling" OR "In Situ Nick-End Labeling" OR "Primed In Situ Labeling" OR TI Rat OR TI Rats OR TI Mice OR TI Mouse OR TI Placebo OR "Drug effects.hw" OR TI Drug OR TI Drugs OR TI "Off Label" OR AB "Off Label" OR Food AND TI "Drug Administration" OR TI "Food labeling" OR TI "Calorie labeling" OR TI Injection OR TI Cigarette))))

# BMJ Open

## Consequences of health condition labelling: protocol for a systematic scoping review

|                                 |                                                                                                                                                                                                                                                                                                                                                                                                                                                                                                                                                    |
|---------------------------------|----------------------------------------------------------------------------------------------------------------------------------------------------------------------------------------------------------------------------------------------------------------------------------------------------------------------------------------------------------------------------------------------------------------------------------------------------------------------------------------------------------------------------------------------------|
| Journal:                        | <i>BMJ Open</i>                                                                                                                                                                                                                                                                                                                                                                                                                                                                                                                                    |
| Manuscript ID                   | bmjopen-2020-037392.R1                                                                                                                                                                                                                                                                                                                                                                                                                                                                                                                             |
| Article Type:                   | Protocol                                                                                                                                                                                                                                                                                                                                                                                                                                                                                                                                           |
| Date Submitted by the Author:   | 15-Jun-2020                                                                                                                                                                                                                                                                                                                                                                                                                                                                                                                                        |
| Complete List of Authors:       | Sims, Rebecca; Bond University Faculty of Health Sciences and Medicine, Institute for Evidence-Based Healthcare<br>Kazda, Luise; The University of Sydney, Sydney School of Public Health<br>Michaleff, Zoe; Bond University Faculty of Health Sciences and Medicine, Institute for Evidence-Based Healthcare<br>Glasziou, Paul; Bond University Faculty of Health Sciences and Medicine, Institute for Evidence-Based Healthcare<br>Thomas, Rae; Bond University Faculty of Health Sciences and Medicine, Institute for Evidence-Based Healthcare |
| <b>Primary Subject Heading</b>: | Public health                                                                                                                                                                                                                                                                                                                                                                                                                                                                                                                                      |
| Secondary Subject Heading:      | Public health                                                                                                                                                                                                                                                                                                                                                                                                                                                                                                                                      |
| Keywords:                       | PUBLIC HEALTH, QUALITATIVE RESEARCH, Quality in health care < HEALTH SERVICES ADMINISTRATION & MANAGEMENT                                                                                                                                                                                                                                                                                                                                                                                                                                          |
|                                 |                                                                                                                                                                                                                                                                                                                                                                                                                                                                                                                                                    |

SCHOLARONE™  
Manuscripts



I, the Submitting Author has the right to grant and does grant on behalf of all authors of the Work (as defined in the below author licence), an exclusive licence and/or a non-exclusive licence for contributions from authors who are: i) UK Crown employees; ii) where BMJ has agreed a CC-BY licence shall apply, and/or iii) in accordance with the terms applicable for US Federal Government officers or employees acting as part of their official duties; on a worldwide, perpetual, irrevocable, royalty-free basis to BMJ Publishing Group Ltd ("BMJ") its licensees and where the relevant Journal is co-owned by BMJ to the co-owners of the Journal, to publish the Work in this journal and any other BMJ products and to exploit all rights, as set out in our [licence](#).

The Submitting Author accepts and understands that any supply made under these terms is made by BMJ to the Submitting Author unless you are acting as an employee on behalf of your employer or a postgraduate student of an affiliated institution which is paying any applicable article publishing charge ("APC") for Open Access articles. Where the Submitting Author wishes to make the Work available on an Open Access basis (and intends to pay the relevant APC), the terms of reuse of such Open Access shall be governed by a Creative Commons licence – details of these licences and which [Creative Commons](#) licence will apply to this Work are set out in our licence referred to above.

Other than as permitted in any relevant BMJ Author's Self Archiving Policies, I confirm this Work has not been accepted for publication elsewhere, is not being considered for publication elsewhere and does not duplicate material already published. I confirm all authors consent to publication of this Work and authorise the granting of this licence.

1  
2  
3 1  
4  
5 2  
6  
7 3  
8  
9 4 **Consequences of health condition labelling: protocol for a systematic scoping review**  
10  
11 5  
12 6  
13  
14 7  
15 8  
16  
17 9

18  
19 10 Rebecca Sims<sup>1</sup>, Luise Kazda<sup>2</sup>, Zoe A Michaleff<sup>1</sup>, Paul Glasziou<sup>1</sup>, Rae Thomas<sup>1</sup>  
20  
21 11

22 12  
23  
24 13  
25  
26 14  
27 15 <sup>1</sup>Institute for Evidence-Based Healthcare (IEBH), Bond University

28  
29 16 <sup>2</sup>Sydney School of Public Health, Faculty of Medicine and Health, The University of Sydney  
30  
31 17

32 18  
33  
34 19  
35  
36 20 Corresponding author: Rae Thomas, Institute for Evidence-Based Healthcare (IEBH), Bond  
37  
38 21 University, 14 University Drive, Robina QLD 4226. Email: [rthomas@bond.edu.au](mailto:rthomas@bond.edu.au)  
39  
40 22

41 23  
42  
43 24 **Keywords:** *labelling; diagnosis; consequences*  
44  
45 25

46 26 **Word Count:** 2063  
47  
48 27  
49  
50 28  
51  
52 29  
53  
54 30  
55  
56  
57  
58  
59  
60

## ABSTRACT

**Introduction.** When health conditions are labelled it is often to classify and communicate a set of symptoms. While diagnostic labelling can provide explanation for an individual's symptoms, it can also impact how individuals and others view those symptoms. Despite existing research regarding the effects of labelling health conditions, a synthesis of these effects has not occurred. We will conduct a systematic scoping review to synthesise the reported consequences and impact of being given a label for a health condition from an individual, societal and health practitioner perspective and explore in what context labelling of health conditions is considered important.

**Methods and analysis.** The review will adhere to the Joanna Briggs Methodology for Scoping Reviews. Searches will be conducted in five electronic databases (PubMed, Embase, PsychINFO, Cochrane, CINAHL). Reference lists of included studies will be screened and forward and backward citation searching of included articles will be conducted. We will include reviews and original studies which describe the consequences for individuals labelled with a non-cancer health condition. We will exclude hypothetical research designs and studies focussed on the consequences of labelling cancer conditions, intellectual disabilities, and/or social attributes. We will conduct thematic analyses for qualitative data and descriptive or meta-analyses for quantitative data where appropriate.

**Ethics and dissemination.** Ethical approval is not required for a scoping review. Results will be disseminated via publication in a peer-reviewed journal, conference presentations, and lay-person summaries on various online platforms. Findings from this systematic scoping review will identify gaps in current understanding of how, when, why, and for whom a diagnostic label is important and inform future research.

## 1 **Strengths and limitations of this study**

- 2 - The findings of this scoping review will be informed by a broad, comprehensive
- 3 search strategy that will be conducted in 5 electronic databases.
- 4 - We will include both qualitative and quantitative studies which will enhance our
- 5 current understanding of the consequences of health condition labelling.
- 6 - Two reviewers will screen 10% of titles and abstracts, extract data and assess quality
- 7 of included studies.
- 8 - Eligibility will not be limited to specific health conditions, therefore, the
- 9 consequences identified will be generalisable to health condition labelling more
- 10 broadly.
- 11 - Articles will be limited to peer-reviewed publications and not include grey or theory-
- 12 based literature

## INTRODUCTION

The diagnosis of physical and psychological health conditions is increasing in prevalence.<sup>1-5</sup> Diagnoses often occur in the context of individuals seeking to identify and treat symptoms. However, diagnoses can also occur as a result of screening tests where individuals have no discernible signs or symptoms of disease (such as when a routine test determines an individual has hypertension),<sup>6</sup> from unanticipated findings in investigations for other health concerns (such as identifying an anomaly in a person's thyroid when conducting an MRI of the spine),<sup>7</sup> or, when people are newly diagnosed with a health condition because of changes to diagnostic thresholds or cut-offs for the condition opposed to changes in individual circumstances (such as for gestational diabetes).<sup>1</sup> The value of a diagnosis, particularly in these latter contexts, is not always evident and the risk of over- and mis-diagnosis is significant.<sup>1 8 9</sup>

Diagnostic labels provide healthcare professionals with a framework from which to organise and interpret clinical symptom presentations, support clinical decision making through directing treatment decisions, and provide information on possible condition course and overall prognosis.<sup>10 11</sup> Further, diagnostic labels allow clinicians to assume homogeneity amongst members of patient groups, in addition to providing an efficient method for health professionals to communicate.<sup>12</sup>

Despite well-meaning intentions, application of diagnostic labels in real-world practice can be problematic. Diagnostic criteria can often be ambiguous. For example, symptoms of anxiety, such as restlessness, fatigue, or difficulty concentrating, may be explained by diagnoses of anxiety, depressive, or bipolar and related disorders.<sup>13 14</sup> Similarly, chest pain symptoms may be explained by several alternative diagnostic categories such as inflammatory diseases, musculoskeletal conditions, or coronary diseases.<sup>15 16</sup> Lastly, non-



1 specific low back pain is the leading cause of disability worldwide, yet for the majority of  
2 people no pathoanatomical cause can be identified.<sup>17</sup>

3 From the perspective of a patient, a diagnostic label can have a significant impact  
4 (negative and positive) on their health outcomes, psychological wellbeing, and behaviour,  
5 and can influence how they are viewed and managed by healthcare professionals and are  
6 perceived by other members in society (e.g. school, workplace).<sup>3 5 18</sup> In a cohort of over  
7 33,000 adults, individuals who were aware that they had hypertension reported elevated  
8 levels of psychological distress compared to those individuals who had hypertension,  
9 however, were unaware of this.<sup>3</sup> A study investigating the impact of labelling borderline  
10 personality disorder on clinician interpretation of patient symptoms found clinicians' prior  
11 awareness of a diagnosis of borderline personality disorder, compared to no awareness,  
12 resulted in a tendency to frame observations of the individual in terms of the label, and a  
13 failure to observe positive behaviours.<sup>12</sup>

14 Conversely, a diagnostic label may have positive effects on the individual. These  
15 include timely referral to necessary healthcare which, in turn, can reduce morbidity and  
16 mortality, improve predictions regarding condition progression as well as facilitate access to  
17 support, services and resources (for example, diagnosis based school funding<sup>19 20</sup> and social  
18 support<sup>5</sup>) and provide an explanation and validation of an individual's signs and symptoms.  
19 A recent study exploring the impact of chronic fatigue syndrome using hypothetical scenarios  
20 of a close friend's diagnosis reported a label of chronic fatigue, compared with no label,  
21 elicited higher sympathetic responses from participants, greater potential social support, and  
22 greater support for active treatment.<sup>5</sup>

23 The terms used to describe a diagnostic label have been found to influence an  
24 individual's behaviour, psychological well-being and treatment preferences. Specifically, a  
25 diagnostic label that uses medicalised and precise terminology compared with a description

1  
2  
3 1 of symptoms has been found to result in higher patient anxiety, greater perceived severity of  
4  
5 2 the condition and a patient preference of more invasive treatments.<sup>18 21-23</sup> This has been  
6  
7 3 evidenced in conditions including gastro-oesophageal reflux disease, polycystic ovary  
8  
9 4 syndrome, bone fracture, and low back pain.<sup>18 21-23</sup> Similarly, research suggests that patients  
10  
11 5 diagnosed with diabetes demonstrate a propensity to medical interventions, including insulin  
12  
13 6 use, oral medication taking, and blood glucose monitoring, compared to less invasive  
14  
15 7 interventions, such as changes to diet and exercise practices.<sup>24</sup> The use of a medicalised label  
16  
17 8 over a descriptive label for a health condition is also suggested to result in increased  
18  
19 9 confidence in the medical professional and greater adoption of sick role behaviour.<sup>25</sup>  
20  
21 10 Alternatively, use of descriptive labels for health conditions was found to be associated with  
22  
23 11 greater patient ownership of the condition.<sup>25</sup>

24  
25  
26  
27  
28 12 To date, our understanding of the consequences and impacts of a diagnostic label has  
29  
30 13 been limited to a single perspective (e.g. patient, health care practitioner), single condition  
31  
32 14 (e.g. gastro-oesophageal reflux disease), or restricted to a specific study design (e.g.  
33  
34 15 hypothetical research design) and a comprehensive synthesis of this information across health  
35  
36 16 conditions is lacking.<sup>26 27</sup> Further, exploring the real world impact of a diagnostic label  
37  
38 17 including benefits and harms has received little attention.<sup>22 28 29</sup> Therefore, the aims of this  
39  
40 18 systematic scoping review are to systematically review original and synthesised research  
41  
42 19 exploring the consequences of being given a label for a health condition to:  
43  
44  
45

- 46 20 1. Identify the range of potential consequences of labelling of health conditions from an  
47  
48 21 individual, societal, and health practitioner viewpoint;
- 49  
50 22 2. Explore why, for whom, and in what contexts labelling of health conditions is, or is not,  
51  
52 23 influential; and,
- 53  
54 24 3. Evaluate the methods used to study the impact of labelling health conditions.  
55  
56  
57  
58  
59  
60

## METHODS AND ANALYSIS

Scoping reviews are suggested as an alternative to systematic reviews, allowing for a broader examination and synthesis of existing research and identification of research gaps.<sup>30</sup> The proposed systematic scoping review will adhere to the Joanna Briggs Methodology for Scoping Reviews,<sup>31</sup> and adhere to the Preferred Reporting Items for Systematic Reviews and Meta-Analyses Extension for Scoping Reviews (PRISMA-ScR).<sup>32</sup> This approach was selected to allow sufficient documentation of the review process. An initial search was conducted in August 2019 to pilot the screening process and data extraction spreadsheet. The review is expected to be complete by October 2020.

### Consumer involvement in scoping review design and framework development

A convenience sampling survey was conducted to explore the public's opinion of the consequences of diagnostic label for health conditions. In April 2019, we posted the questions "What are the labelling consequences of being given a health diagnosis? We're working up a list and so far we have: anxiety, relief, more tests, stigma, medico-legal problems. What else?" on two social media platforms, Facebook and Twitter. Responses on Facebook included 14 comments from six individuals, while Twitter responses resulted in 45 comments from 40 individuals. The results of this survey were used to inform the development of the search strategy, inclusion and exclusion criteria, data extraction form, and an initial qualitative framework (Table 1) that will be used in this scoping review.

Table 1. Coding Framework of Social Media Responses.

| Name                 | Description                       | Examples                                                                                                                                                      |
|----------------------|-----------------------------------|---------------------------------------------------------------------------------------------------------------------------------------------------------------|
| Psychological Impact | Psychological impact of diagnosis | <ul style="list-style-type: none"> <li>- Increased self-understanding</li> <li>- Stigma (internalised stigma (self); perceived stigma from others)</li> </ul> |

|             |            |                                                                                     |                                                                                                                                                                                                                       |
|-------------|------------|-------------------------------------------------------------------------------------|-----------------------------------------------------------------------------------------------------------------------------------------------------------------------------------------------------------------------|
|             |            |                                                                                     | <ul style="list-style-type: none"> <li>- Increased psychological distress (anxiety, depression, phobia, worry, fear, stress)</li> </ul>                                                                               |
| Support     |            | Support gained or loss as a result of diagnosis                                     | <ul style="list-style-type: none"> <li>- Support groups: Increased support of others with similar diagnosis; network with other patients</li> <li>- Others less respectful, more withdrawn and judgemental</li> </ul> |
| Development | Education  | Seeking to become more informed on diagnoses, testing, intervention                 | <ul style="list-style-type: none"> <li>- Increase in health literacy due to motivation to find about treatment options</li> </ul>                                                                                     |
|             | Planning   | Forward planning and decision making as a result of diagnosis                       | <ul style="list-style-type: none"> <li>- Ability to plan – even if there may not be treatment, provides opportunity to get affairs in order (e.g. wills).</li> </ul>                                                  |
| Lifestyle   | Behaviour  | Behaviour changes as a result of diagnosis                                          | <ul style="list-style-type: none"> <li>- Change diet</li> <li>- Change lifestyle</li> </ul>                                                                                                                           |
|             | Employment | Effect of diagnosis on employment                                                   | <ul style="list-style-type: none"> <li>- More Sick days; Time off work; absenteeism</li> </ul>                                                                                                                        |
|             | Financial  | Effect of diagnosis on finances                                                     | <ul style="list-style-type: none"> <li>- Diagnosis provides access to funds (e.g. Medicare, NDIS, insurance)</li> </ul>                                                                                               |
| Service Use | Testing    | Further assessment and tests as a result of diagnosis (including testing of family) | <ul style="list-style-type: none"> <li>- Seeking more investigations</li> <li>- Scans and imaging</li> <li>- Encourages screening of other family members at low-risk of the condition</li> </ul>                     |
|             | Treatment  | Treatment and intervention as a result of diagnosis                                 | <ul style="list-style-type: none"> <li>- Clear Treatment path; clearer treatment protocols</li> <li>- Side-effects (of medication sexual, agitation, suicidality, emotional numbing)</li> </ul>                       |

## 1 Inclusion criteria

2 Peer reviewed publications including systematic or literature reviews and original  
 3 studies which describe the perceived consequences for individuals labelled with a non-cancer  
 4 health condition will be included. Perceived consequences can be reported from the  
 5 perspectives of the individuals, their family, friends, and/or carers, or health professionals.  
 6 As we expect individuals labelled as having a cancer condition will have different  
 7 experiences to those labelled with general health conditions, studies that focus on these  
 8 samples are excluded. Similarly, studies that report the consequence of labels for people  
 9 using hypothetical case scenarios, or individuals with intellectual disabilities and/or social  
 10 attributes such as race, sexual identity or orientation will also be excluded (see Table 2 for  
 11 more details).

12 Table 2. Inclusion Criteria

| Aspect           | Inclusion Criteria                                                                                                                                                                                                                                         | Exclusion Criteria                                                                                                                                                                                         |
|------------------|------------------------------------------------------------------------------------------------------------------------------------------------------------------------------------------------------------------------------------------------------------|------------------------------------------------------------------------------------------------------------------------------------------------------------------------------------------------------------|
| Types of studies | Original Studies (Cohort, Case-Controlled, Cross-Sectional, Observational, RCT, Focus Groups)*<br>Synthesised Studies (Systematic Reviews)<br><i>*Studies utilising qualitative methodologies do not require multiple group comparisons for inclusion.</i> | Protocols (final study to be sourced)<br>Opinion pieces and commentaries<br>Quantitative Cohort, Case-Controlled, and Cross-Sectional studies without comparator<br>Hypothetical or vignette based studies |

|              |                                                                                                                                                                                                                                                                                                                                                  |                                                                                                                                                                                                                                                                                                                                                                                                         |
|--------------|--------------------------------------------------------------------------------------------------------------------------------------------------------------------------------------------------------------------------------------------------------------------------------------------------------------------------------------------------|---------------------------------------------------------------------------------------------------------------------------------------------------------------------------------------------------------------------------------------------------------------------------------------------------------------------------------------------------------------------------------------------------------|
| Participants | Individuals, no age limit (e.g. adults, children, family, carers, health professionals, general public)                                                                                                                                                                                                                                          | Animal subjects                                                                                                                                                                                                                                                                                                                                                                                         |
| Condition    | <p>Screening and/or labelling of physical or psychological health condition/s</p> <p>Self-reported (e.g. response to questions such as “has your GP ever told you that you have hypertension?”)</p> <p>Health condition confirmed (e.g. medical examination and testing completed as part of the study)</p>                                      | <p>Labelling of intellectual impairment, race, ethnicity, sexual identity or sexual orientation</p> <p>Labelling of cancers and cancer related conditions</p> <p>Self-reported conditions provided by unqualified professional (e.g. physiotherapist telling patient they have hypertension)</p> <p>Self-identified conditions (e.g. googling of symptoms, no confirmation by medical professional)</p> |
| Outcomes     | <p>Consequences, impact, effects of the health condition label or diagnosis</p> <p>Perceived harms and/or benefits (e.g. illness burden)</p> <ul style="list-style-type: none"> <li>- Lived experience</li> <li>- Psychological impact (e.g. anxiety, quality of life)</li> <li>- Behaviour change (e.g. participation in employment)</li> </ul> | <p>Effect of the health condition (e.g. disease mechanisms/traits)</p> <p>Gene labelling</p> <p>Food or nutrition labelling</p> <p>Drug effects/effectiveness</p> <p>Intervention effects/effectiveness (e.g. intervention A vs intervention B)</p>                                                                                                                                                     |

|          |                                            |   |
|----------|--------------------------------------------|---|
|          | - Support (e.g. financial, social support) |   |
| Language | No language limitations                    | - |
| Date     | No date limitations                        | - |

## Search strategy

A structured search, developed in collaboration with an information specialist, of five electronic databases (PubMed, Embase, PsychINFO, Cochrane, CINAHL) will be conducted to identify relevant publications. Databases will be searched from their inception.

Preliminary searches were conducted in August 2019 and will be updated in June 2020.

Reference lists of included articles will be searched and forward citation searching of included articles will be conducted. The full search strategy to be used is reported in the Supplementary Material.

## Study selection

Titles and abstracts of 10% of articles retrieved through electronic and manual searches will be independently screened by two reviewers (RS and LK) for eligibility against the pre-specified inclusion criteria. Disagreements will be resolved through discussion and consultation with additional reviewers as required. When interrater reliability (Kappa) >0.8 is achieved for the screened studies, remaining studies will continue to be screened by one reviewer (RS). Articles identified as unclear for inclusion will be reviewed by an additional reviewer as required.

## 1 **Data extraction**

2 Full text publications will be obtained for any potentially relevant studies and will be  
3 screened for inclusion against the same inclusion criteria by one reviewer (RS). Additional  
4 uncertainties regarding eligibility for inclusion will be resolved through discussion with two  
5 other reviewers (RT and PG). Two reviewers (RS and ZAM) will independently extract  
6 study meta-data and quantitative data from 10% of included studies using a standardised data  
7 extraction form in Microsoft Excel that will be piloted prior to full-text data extraction.

8 These same reviewers will also extract qualitative data from 10% of studies using  
9 NVivo version 12. Conflicts will be resolved by a third party as required. When interrater  
10 reliability (Kappa) >0.8 is achieved for extracted data, one reviewer (RS) will continue to  
11 extract data from a random sample of one-third of the remaining included studies, expanding  
12 and amending the coding framework as required. Queries will be resolved through  
13 discussion with a second reviewer (ZAM). A second third of the remaining included studies  
14 will be randomly selected and reviewed, and data extracted to the coding framework, which  
15 will be expanded and amended as necessary. Data saturation will be defined using indicative  
16 thematic saturation, which states data saturation as the non-emergence of new codes or  
17 themes.<sup>33</sup> Extracted data will include study characteristics (author, journal, year of  
18 publication, study country and setting), participant characteristics (number of participants,  
19 age, health condition), and outcomes (consequences, impact, effects of the diagnostic label).  
20 For qualitative studies, we will extract author reported themes and supporting quotes  
21 provided in the published manuscripts and apply these to the coding framework. For studies  
22 with quantitative measures, extracted data will include, but is not limited to, author  
23 summaries of primary and secondary outcomes from validated and unvalidated measures (for  
24 example, Short Form Health Survey (SF-36)<sup>34</sup>, or General Health Questionnaire (GHQ)<sup>35</sup>), as  
25 identified in the results section of the published study.



## 1 Patient and public involvement

2 This scoping review has no direct patient involvement.

## 4 Study quality

5 Study quality will be assessed using appraisal tools appropriate for the designs  
6 identified, for example, the McGill Mixed Methods Critical Appraisal Tool (MMAT)<sup>36</sup> will  
7 be used for original studies and Assessing the Methodological Quality of Systematic  
8 Reviews, version 2 (AMSTAR-2)<sup>37</sup> will be used for systematic reviews. The former critical  
9 appraisal tool has been developed for evaluating original studies utilising qualitative,  
10 quantitative, or mixed methodologies, while the latter tool was developed for appraising the  
11 quality of systematic reviews which include randomised or non-randomised studies. Quality  
12 assessment will be conducted independently by two authors (RS and ZAM) for 10% of the  
13 included studies. Conflicts will be resolved through discussion or by a third reviewer, as  
14 necessary.

## 16 PRESENTATION OF RESULTS

17 We will present study selection in a flow diagram according to PRISMA-Scr and  
18 included studies will be described in a table of characteristics.<sup>32</sup> Results will be aggregated as  
19 appropriate. Results pertinent to the consequences of labelling of health conditions will be  
20 collated to expand those provided in Table 1, with empirical data regarding rate and severity  
21 of these consequences also examined. Additionally, a compendium of methods used to elicit  
22 consequences of health condition labelling will be developed and methodology appraised.  
23 For quantitative studies, extracted data will be tabulated in a descriptive and/or statistical  
24 manner depending on the availability of data (i.e. number of studies reporting similar  
25 outcome measures or measurement of similar constructs, such as quality of life or symptoms

1  
2  
3 1 of anxiety) and degree of heterogeneity between studies (e.g. population, clinical conditions).  
4  
5 2 Should data not support a meta-analysis, results from studies which provide quantitative data  
6  
7 3 will be reported in a narrative synthesis and interpreted alongside results from qualitative  
8  
9 4 studies. Qualitative data will be analysed using developed frameworks (see Table 1), and  
10  
11 5 following established protocols for the qualitative analysis of information in the social  
12  
13 6 sciences.<sup>38</sup> The characteristics and results of all included studies will be reported in tables  
14  
15 7 and summarised in text.  
16  
17  
18  
19 8

### 9 **Ethics and Dissemination**

10 As the current study is a systematic scoping review protocol, ethics is not required.  
11  
12 Dissemination of results will be made public via peer-reviewed publications, conference  
13  
14 presentations and lay-person summaries on various on-line platforms (e.g. The  
15  
16  
17  
18  
19  
20  
21  
22  
23  
24  
25  
26  
27  
28  
29  
30  
31  
32  
33  
34  
35  
36  
37  
38  
39  
40  
41  
42  
43  
44  
45  
46  
47  
48  
49  
50  
51  
52  
53  
54  
55  
56  
57  
58  
59  
60  
Conversation).

## REQUIRED STATEMENTS

**Twitter:** Rebecca Sims @BecSims90, Luise Kazda @LuiseKazda, Zoe A Michaleff @ZoeMichaleff, Paul Glasziou @PaulGlasziou, Rae Thomas @rthomasEBP

**Acknowledgements:** The authors thank Justin Clark, Senior Research Information Specialist at the Institute for Evidence-Based Healthcare, Bond University for assistance with constructing the search strategy.

**Author Contributions:** RS, PG, and RT contributed to the conception and design of the protocol, initial public ‘survey’ and construction of the search terms. RS, LK, and ZAM contributed to screening and data analysis. RS, ZAM, RT, and PG contributed to the drafting of the manuscript and all authors approved the final version.

**Funding:** RS is supported by an Australian Government Research Training Program Scholarship. RT and ZAM are supported by a National Health and Medical Research Council Program grant (#1106452). LK is supported by a Centres of Research Excellence Grant (#1104136). PG is supported by a NHMRC Research Fellowship (#1080042). The funding sources have no role in study design, data collection, data analysis, data interpretation, or writing of the report.

**Competing Interests:** None declared.

**Patient consent for publication:** Not required.

**Orcid iDs:** Rebecca Sims <https://orcid.org/0000-0002-1604-8354>

Luise Kazda <http://orcid.org/0000-0003-4105-0402>

Zoe A Michaleff <https://orcid.org/0000-0002-0360-4956>

Paul Glasziou <https://orcid.org/0000-0001-7564-073X>

Rae Thomas <http://orcid.org/0000-0002-2165-5917>

## REFERENCES

1. Sexton H, Heal C, Banks J, Braniff K. Impact of new diagnostic criteria for gestational diabetes. *J Obstet Gynaecol Res* 2018;44:425-31. doi: 10.1111/jog.13544.
2. Australian Bureau of Statistics. National Health Survey: First Results, 2017-18. Web site: <https://www.abs.gov.au/ausstats/abs@.nsf/mf/4364.0.55.001>. Updated May 27, 2019. Accessed November 30, 2019.
3. Hamer M, Batty GD, Stamatakis E, Kivimaki M. Hypertension awareness and psychological distress. *Hypertens* 2010;56:547-50. doi: 10.1161/hypertensionaha.110.153775.
4. Thombs BD, Kwakkenbos L, Levis AW, Benedetti A. Addressing overestimation of the prevalence of depression based on self-report screening questionnaires. *Can Med Assoc J* 2018;190:E44. doi: 10.1503/cmaj.170691.
5. Noble S, Bonner C, Hersch J, Jansen J, McGeechan K, McCaffery K. Could disease labelling have positive effects? An experimental study exploring the effect of the chronic fatigue syndrome label on intended social support. *Patient Educ Couns* 2019;102:486-93. doi: 10.1016/j.pec.2018.10.011.
6. Walker MJ, Rogers WA. Diagnosis, narrative identity, and asymptomatic disease. *Theor Med Bioeth* 2017;38:307-21. doi: 10.1007/s11017-017-9412-1.
7. Hiremath SB, Boto J, Regnaud A, Etienne L, Fitsiori A, Vargas MI. Incidentalomas in spine and spinal cord imaging. *Clin Neuroradiol* 2019;29:191-213. doi: 10.1007/s00062-019-00773-5.
8. Doust J, Glasziou P. Is the problem that everything is a diagnosis? *Aust Fam Physician* 2013;42:856-9.
9. Brodersen J, Schwartz LM, Heneghan C, O'Sullivan JW, Aronson JK, Woloshin S. Overdiagnosis: what it is and what it isn't. *BMJ Evid Based Med* 2018;23:1-3. doi: 10.1136/ebmed-2017-110886.
10. Frances A, First M, Pincus HA, Widiger T, Davis W. An introduction to DSM-IV. *Hosp Community Psychiatry* 1990;41:493-95.
11. Croft P, Altman DG, Deeks JJ, et al. The science of clinical practice: disease diagnosis or patient prognosis? Evidence about "what is likely to happen" should shape clinical practice. *BMC Med* 2015;13:20. doi: 10.1186/s12916-014-0265-4.
12. Lam DC, Poplavskaya EV, Salkovskis PM, Hogg LI, Panting H. An experimental investigation of the impact of personality disorder diagnosis on clinicians: can we see past the borderline? *Behav Cogn Psychother* 2016;44:361-73. doi: 10.1017/s1352465815000351.
13. Allsopp K, Read J, Corcoran R, Kinderman P. Heterogeneity in psychiatric diagnostic classification. *Psychiatry Res* 2019;279:15-22. doi: 10.1016/j.psychres.2019.07.005
14. American Psychological Association. *Diagnostic and Statistical Manual for Mental Disorders, Fifth Edition*. Washington, D.C.: American Psychiatric Association, 2013.
15. Christiansen J. Less is more: chest pain pathways in clinical care. *Med J Aust* 2017;207:193-94. doi: 10.5694/mja17.00331
16. Sturm C, Witte T. Musculoskeletal-related chest pain. *Der Internist* 2017;58:39-46. doi: 10.1007/s00108-016-0166-z.
17. Hartvigsen J, Hancock MJ, Kongsted A, et al. What low back pain is and why we need to pay attention. *Lancet* 2018;391:2356-67. doi: 10.1016/s0140-6736(18)30480-x.
18. Scherer LD, Zikmund-Fisher BJ, Fagerlin A, Tarini BA. Influence of "GERD" label on parents' decision to medicate infants. *Pediatr* 2013;131:839-45. doi: 10.1542/peds.2012-3070.

19. Parliament of Australia. Access to real learning: the impact of policy, funding and culture on students with disability. [https://www.aph.gov.au/Parliamentary\\_Business/Committees/Senate/Education\\_and\\_Employment/students\\_with\\_disability/Report](https://www.aph.gov.au/Parliamentary_Business/Committees/Senate/Education_and_Employment/students_with_disability/Report). Published 2016. Accessed November 30, 2019.
20. Witham M. Funding the need not the label. Presented at: AARE Conference; 2015; Western Australia, Australia.
21. Nickel B, Barratt A, Copp T, Moynihan R, McCaffery K. Words do matter: a systematic review on how different terminology for the same condition influences management preferences. *BMJ Open* 2017;7:e014129. doi: 10.1136/bmjopen-2016-014129.
22. Copp T, McCaffery K, Azizi L, Doust J, Mol BWJ, Jansen J. Influence of the disease label 'polycystic ovary syndrome' on intention to have an ultrasound and psychosocial outcomes: a randomised online study in young women. *Hum Reprod* 2017;32:876-84. doi: 10.1093/humrep/dex029.
23. O'Keefe M. Do different diagnostic labels for low back pain influence management preferences: an online randomised controlled study. Presented at: Preventing Overdiagnosis Conference; December 5, 2019; Sydney, Australia.
24. Kavookjian J, Berger BA, Grimley DM, Villaume WA, Anderson HM, Barker KN. Patient decision making: strategies for diabetes diet adherence intervention. *Res Social Adm Pharm* 2005;1:389-407. doi: 10.1016/j.sapharm.2005.06.006.
25. Ogden J, Branson R, Bryett A, et al. What's in a name? An experimental study of patients' views of the impact and function of a diagnosis. *Fam Pract* 2003;20:248-53.
26. Macdonald LA, Sackett DL, Haynes RB, Taylor DW. Labelling in hypertension: A review of the behavioural and psychological consequences. *J Chronic Dis* 1984;37:933-42. doi: 10.1016/0021-968190070-5.
27. Cotter AR, Vuong K, Mustelin LL, et al. Do psychological harms result from being labelled with an unexpected diagnosis of abdominal aortic aneurysm or prostate cancer through screening? A systematic review. *BMJ Open* 2017;7:e017565. doi: 10.1136/bmjopen-2017-017565.
28. Betsch TA, Gorodzinsky AY, Finley GA, et al. What's in a name? Health care providers' perceptions of pediatric pain patients based on diagnostic labels. *Clin J Pain* 2017;33:694-98. doi: 10.1097/ajp.0000000000000454.
29. Lancaster AM. *Impact of diagnostic versus emotional disturbance label on preservice teacher expectations of student academic, behavior, and social outcomes* [PhD Thesis]. Mississippi: Mississippi State University; 2016.
30. Arksey H, O'Malley L. Scoping studies: towards a methodological framework. *Int J Soc Res Methodol* 2005;8:19-32. doi: 10.1080/1364557032000119616.
31. Peters M, Godfrey C, McInerney P, Soares CB, Khalil H, Parker D. In: Aromataris E, Munn Z, eds. *Joanna Briggs Institute review's manual*. The Joanna Briggs Institute, 2017.
32. Tricco AC, Lillie E, Zarin W, et al. PRISMA extension for scoping reviews (PRISMA-ScR): checklist and explanation. *Ann Intern Med* 2018;169:467-73.
33. Saunders B, Sim J, Kingstone T et al. Saturation in qualitative research: exploring its conceptualisation and operationalisation. *Qual Quant* 2018;52:1893-1907. doi:10.1007/s11135-017-0574-8.
34. Ware JE, Sherbourne CD. The MOS 36-item short-form health survey (SF-36): conceptual framework and item selection. *Med care* 1992;30:473-83.
35. Goldberg D, Williams P. *A User's Guide to the General Health Questionnaire*. Windsor, Berks: NFER-Nelson. 1988.

- 1  
2  
3 1 36. Hong Q, Fabregues S, Bartlett G, et al. The Mixed Methods Appraisal Tool (MMAT)  
4 2 version 2018 for information professionals and researchers. *Educ Inf* 2018;34:285-  
5 3 291. doi: 10.3233/EFI-180221.  
6 4  
7 4 37. Shea BJ, Reeves BC, Wells G, et al. AMSTAR 2: a critical appraisal tool for systematic  
8 5 reviews that include randomised or non-randomised studies of healthcare  
9 6 interventions, or both. *BMJ* 2017;358:j4008. doi: 10.1136/bmj.j4008.  
10 7  
11 7 38. Ritchie J, Lewis J, McNaughton Nicholls C, Ormston R, eds. *Qualitative Research*  
12 8 *Practice: A Guide for Social Science Students and Researchers*. 2nd ed. London, UK:  
13 9 Sage Publications Ltd. 2014.

14 10

15 11

For peer review only

Supplementary Material  
**Search Strategies**

**PubMed**

(Health[tiab] OR Illness[tiab] OR Disorder[tiab] OR Condition[tiab] OR Disease[tiab])

AND

((Psychological[ti] OR Label[tiab] OR Labelling[tiab] OR Labeling[tiab]) AND  
 (Diagnosis[tiab] OR Diagnostic[tiab] OR Screening[Mesh] OR Screening[tiab] OR  
 Screened[tiab]))

AND

(Patient[tiab] OR Patients[tiab] OR Individuals[tiab] OR Self[tiab] OR Parent[tiab] OR  
 Family[tiab] OR Adult[tiab] OR Men[tiab] OR Women[tiab])

AND

(Attitude[Mesh] OR Awareness[tiab] OR Stigma[tiab] OR Beliefs[tiab] OR Well-being[tiab]  
 OR Wellbeing[tiab] OR Meaning[tiab] OR Impact[tiab] OR Effect[tiab] OR Effects[tiab] OR  
 Influence[tiab] OR Experience[tiab])

AND

("Systematic review"[tiab] OR "Systematic Review"[pt] OR "Cochrane Database Syst  
 Rev"[ta] OR "meta analysis"[pt] OR "meta analysis"[tiab] OR ((Search[tiab] OR  
 Searched[tiab] OR Searches[tiab]) AND (PubMed[tiab] OR Medline[tiab] OR Database[tiab]  
 OR Databases[tiab])) OR "randomized controlled trial"[pt] OR "controlled clinical trial"[pt]  
 OR randomized[tiab] OR randomised[tiab] OR placebo[tiab] OR randomly[tiab] OR  
 trial[tiab] OR groups[tiab] OR "Epidemiologic Studies"[Mesh] OR "case-control  
 studies"[Mesh] OR "Cohort Studies"[Mesh] OR "case control"[tiab] OR Cohort[tiab] OR  
 "Follow up"[tiab] OR Observational[tiab] OR Longitudinal[tiab] OR Prospective[tiab] OR  
 retrospective[tiab] OR "cross sectional"[tiab] OR "Cross-Sectional Studies"[Mesh] OR  
 Investigated[tiab] OR Analysis[tiab] OR Statistics[tiab] OR Data[tiab] OR "statistics and  
 numerical data"[sh] OR "epidemiology"[sh])

NOT

(Animals[Mesh] NOT (Animals[Mesh] AND Humans[Mesh]))

NOT

(Injections[Mesh] OR Open-Label[tiab] OR "Product Labeling"[Mesh] OR "Drug  
 Labeling"[Mesh] OR "Affinity Labels"[Mesh] OR "Food Labeling"[Mesh] OR "Isotope  
 Labeling"[Mesh] OR "Staining and Labeling"[Mesh] OR "In Situ Nick-End Labeling"[Mesh]  
 OR "Primed In Situ Labeling"[Mesh] OR Rat[ti] OR Rats[ti] OR Mice[ti] OR Mouse[ti] OR  
 Placebo[ti] OR "Drug effects"[sh] OR Drug[ti] OR Drugs[ti] OR "Food and Drug  
 Administration"[ti] OR "Food labeling"[ti] OR "Calorie labeling"[ti] OR Injection[ti] OR  
 Cigarette[ti])



**Embase**

1  
2  
3  
4 (((Health:ti,ab OR Illness:ti,ab OR Disorder:ti,ab OR Condition:ti,ab OR Disease:ti,ab)))  
5  
6 AND  
7 (((Psychological:ti OR Label:ti,ab OR Labelling:ti,ab OR Labeling:ti,ab) AND  
8 (Diagnosis:ti,ab OR Diagnostic:ti,ab OR Screening:ti,ab OR Screening:ti,ab OR  
9 Screened:ti,ab))))  
10  
11 AND  
12 (((Patient:ti,ab OR Patients:ti,ab OR Individuals:ti,ab OR Self:ti,ab OR Parent:ti,ab OR  
13 Family:ti,ab OR Adult:ti,ab OR Men:ti,ab OR Women:ti,ab)))  
14  
15 AND  
16 (((Attitude:ti,ab OR Awareness:ti,ab OR Stigma:ti,ab OR Beliefs:ti,ab OR Well-being:ti,ab  
17 OR Wellbeing:ti,ab OR Meaning:ti,ab OR Impact:ti,ab OR Effect:ti,ab OR Effects:ti,ab OR  
18 Influence:ti,ab OR Experience:ti,ab)))  
19  
20 AND  
21  
22 (((("Systematic review":ti,ab OR "Systematic Review":it OR "Cochrane Database Syst  
23 Rev.jn" OR "meta analysis":it OR "meta analysis":ti,ab OR ((Search:ti,ab OR Searched:ti,ab  
24 OR Searches:ti,ab) AND (PubMed:ti,ab OR Medline:ti,ab OR Database:ti,ab OR  
25 Databases:ti,ab)) OR "randomized controlled trial":it OR "controlled clinical trial":it OR  
26 randomized:ti,ab OR randomised:ti,ab OR placebo:ti,ab OR randomly:ti,ab OR trial:ti,ab OR  
27 groups:ti,ab OR "Epidemiologic Studies" OR "case-control studies" OR "Cohort Studies" OR  
28 "case control":ti,ab OR Cohort:ti,ab OR "Follow up":ti,ab OR Observational:ti,ab OR  
29 Longitudinal:ti,ab OR Prospective:ti,ab OR retrospective:ti,ab OR "cross sectional":ti,ab OR  
30 "Cross-Sectional Studies" OR Investigated:ti,ab OR Analysis:ti,ab OR Statistics:ti,ab OR  
31 Data:ti,ab OR epidemiology:ti,ab)))  
32  
33 NOT  
34  
35  
36 (((Injections OR Open-Label:ti,ab OR "Product Labeling" OR "Drug Labeling" OR "Drug  
37 Therapy" OR "Affinity Labels" OR "Food Labeling" OR "Isotope Labeling" OR "Staining  
38 and Labeling" OR "In Situ Nick-End Labeling" OR "Primed In Situ Labeling" OR Rat:ti OR  
39 Rats:ti OR Mice:ti OR Mouse:ti OR Placebo:ti OR "Drug effects.hw" OR Drug:ti OR  
40 Drugs:ti OR "Off Label":ti,ab OR Food AND "Drug Administration":ti OR "Food  
41 labeling":ti OR "Calorie labeling":ti OR Injection:ti OR Cigarette:ti)))  
42  
43  
44  
45  
46  
47  
48  
49  
50  
51  
52  
53  
54  
55  
56  
57  
58  
59  
60



**PsychINFO**

((Health.ti,ab OR Illness.ti,ab OR Disorder.ti,ab OR Condition.ti,ab OR Disease.ti,ab))

AND

((Psychological.ti OR Label.ti,ab OR Labelling.ti,ab OR Labeling.ti,ab) AND

(Diagnosis.ti,ab OR Diagnostic.ti,ab OR Screening.ti,ab OR Screening.ti,ab OR

Screened.ti,ab)))

AND

((Patient.ti,ab OR Patients.ti,ab OR Individuals.ti,ab OR Self.ti,ab OR Parent.ti,ab OR

Family.ti,ab OR Adult.ti,ab OR Men.ti,ab OR Women.ti,ab))

AND

((Attitude.ti,ab OR Awareness.ti,ab OR Stigma.ti,ab OR Beliefs.ti,ab OR Well-being.ti,ab

OR Wellbeing.ti,ab OR Meaning.ti,ab OR Impact.ti,ab OR Effect.ti,ab OR Effects.ti,ab OR

Influence.ti,ab OR Experience.ti,ab))

AND

((Systematic review.ti,ab OR Systematic Review.pt OR Cochrane Database Syst Rev.jn OR

meta analysis.pt OR meta analysis.ti,ab OR ((Search.ti,ab OR Searched.ti,ab OR

Searches.ti,ab) AND (PubMed.ti,ab OR Medline.ti,ab OR Database.ti,ab OR

Databases.ti,ab)) OR randomized controlled trial.pt OR controlled clinical trial.pt OR

randomized.ti,ab OR randomised.ti,ab OR placebo.ti,ab OR randomly.ti,ab OR trial.ti,ab OR

groups.ti,ab OR "Epidemiologic Studies" OR "case-control studies" OR "Cohort Studies" OR

case control.ti,ab OR Cohort.ti,ab OR Follow up.ti,ab OR Observational.ti,ab OR

Longitudinal.ti,ab OR Prospective.ti,ab OR retrospective.ti,ab OR cross sectional.ti,ab OR

"Cross-Sectional Studies" OR Investigated.ti,ab OR Analysis.ti,ab OR Statistics.ti,ab OR

Data.ti,ab OR epidemiology.ti,ab))

NOT

((Injections OR Open-Label.ti,ab OR "Product Labeling" OR "Drug Labeling" OR "Drug

Therapy" OR "Affinity Labels" OR "Food Labeling" OR "Isotope Labeling" OR "Staining

and Labeling" OR "In Situ Nick-End Labeling" OR "Primed In Situ Labeling" OR Rat.ti OR

Rats.ti OR Mice.ti OR Mouse.ti OR Placebo.ti OR Drug effects.hw OR Drug.ti OR Drugs.ti

OR Off Label.ti,ab OR Food and Drug Administration.ti OR Food labeling.ti OR Calorie

labeling.ti OR Injection.ti OR Cigarette.ti))

Only

**Cochrane**

(((Health:ti,ab OR Illness:ti,ab OR Disorder:ti,ab OR Condition:ti,ab OR Disease:ti,ab)))

AND

(((Psychological:ti OR Label:ti,ab OR Labelling:ti,ab OR Labeling:ti,ab) AND

(Diagnosis:ti,ab OR Diagnostic:ti,ab OR Screening:ti,ab OR Screening:ti,ab OR

Screened:ti,ab))))

AND

(((Patient:ti,ab OR Patients:ti,ab OR Individuals:ti,ab OR Self:ti,ab OR Parent:ti,ab OR

Family:ti,ab OR Adult:ti,ab OR Men:ti,ab OR Women:ti,ab)))

AND

(((Attitude:ti,ab OR Awareness:ti,ab OR Stigma:ti,ab OR Beliefs:ti,ab OR Well-being:ti,ab

OR Wellbeing:ti,ab OR Meaning:ti,ab OR Impact:ti,ab OR Effect:ti,ab OR Effects:ti,ab OR

Influence:ti,ab OR Experience:ti,ab)))

AND

(((("Systematic review":ti,ab OR "Systematic Review":pt OR "Cochrane Database Syst

Rev.jn" OR "meta analysis":pt OR "meta analysis":ti,ab OR ((Search:ti,ab OR Searched:ti,ab

OR Searches:ti,ab) AND (PubMed:ti,ab OR Medline:ti,ab OR Database:ti,ab OR

Databases:ti,ab)) OR "randomized controlled trial":pt OR "controlled clinical trial":pt OR

randomized:ti,ab OR randomised:ti,ab OR placebo:ti,ab OR randomly:ti,ab OR trial:ti,ab OR

groups:ti,ab OR "Epidemiologic Studies" OR "case-control studies" OR "Cohort Studies" OR

"case control":ti,ab OR Cohort:ti,ab OR "Follow up":ti,ab OR Observational:ti,ab OR

Longitudinal:ti,ab OR Prospective:ti,ab OR retrospective:ti,ab OR "cross sectional":ti,ab OR

"Cross-Sectional Studies" OR Investigated:ti,ab OR Analysis:ti,ab OR Statistics:ti,ab OR

Data:ti,ab OR epidemiology:ti,ab)))

NOT

(((Injections OR Open-Label:ti,ab OR "Product Labeling" OR "Drug Labeling" OR "Drug

Therapy" OR "Affinity Labels" OR "Food Labeling" OR "Isotope Labeling" OR "Staining

and Labeling" OR "In Situ Nick-End Labeling" OR "Primed In Situ Labeling" OR Rat:ti OR

Rats:ti OR Mice:ti OR Mouse:ti OR Placebo:ti OR "Drug effects.hw" OR Drug:ti OR

Drugs:ti OR "Off Label":ti,ab OR Food AND "Drug Administration":ti OR "Food

labeling":ti OR "Calorie labeling":ti OR Injection:ti OR Cigarette:ti)))

**CINAHL**

((((TI Health OR AB Health OR TI Illness OR AB Illness OR TI Disorder OR AB Disorder OR TI Condition OR AB Condition OR TI Disease OR AB Disease))))

AND

((((TI Psychological OR TI Label OR AB Label OR TI Labelling OR AB Labelling OR TI Labeling OR AB Labeling) AND (TI Diagnosis OR AB Diagnosis OR TI Diagnostic OR AB Diagnostic OR TI Screening OR AB Screening OR TI Screening OR AB Screening OR TI Screened OR AB Screened))))

AND

((((TI Patient OR AB Patient OR TI Patients OR AB Patients OR TI Individuals OR AB Individuals OR TI Self OR AB Self OR TI Parent OR AB Parent OR TI Family OR AB Family OR TI Adult OR AB Adult OR TI Men OR AB Men OR TI Women OR AB Women))))

AND

((((TI Attitude OR AB Attitude OR TI Awareness OR AB Awareness OR TI Stigma OR AB Stigma OR TI Beliefs OR AB Beliefs OR TI Well-being OR AB Well-being OR TI Wellbeing OR AB Wellbeing OR TI Meaning OR AB Meaning OR TI Impact OR AB Impact OR TI Effect OR AB Effect OR TI Effects OR AB Effects OR TI Influence OR AB Influence OR TI Experience OR AB Experience))))

AND

((((TI "Systematic review" OR AB "Systematic review" OR PT "Systematic Review" OR "Cochrane Database Syst Rev.jn" OR PT "meta analysis" OR TI "meta analysis" OR AB "meta analysis" OR ((TI Search OR AB Search OR TI Searched OR AB Searched OR TI Searches OR AB Searches) AND (TI PubMed OR AB PubMed OR TI Medline OR AB Medline OR TI Database OR AB Database OR TI Databases OR AB Databases)) OR PT "randomized controlled trial" OR PT "controlled clinical trial" OR TI randomized OR AB randomized OR TI randomised OR AB randomised OR TI placebo OR AB placebo OR TI randomly OR AB randomly OR TI trial OR AB trial OR TI groups OR AB groups OR "Epidemiologic Studies" OR "case-control studies" OR "Cohort Studies" OR TI "case control" OR AB "case control" OR TI Cohort OR AB Cohort OR TI "Follow up" OR AB "Follow up" OR TI Observational OR AB Observational OR TI Longitudinal OR AB Longitudinal OR TI Prospective OR AB Prospective OR TI retrospective OR AB retrospective OR TI "cross sectional" OR AB "cross sectional" OR "Cross-Sectional Studies" OR TI Investigated OR AB Investigated OR TI Analysis OR AB Analysis OR TI Statistics OR AB Statistics OR TI Data OR AB Data OR TI epidemiology OR AB epidemiology))))

NOT

((((Injections OR TI Open-Label OR AB Open-Label OR "Product Labeling" OR "Drug Labeling" OR "Drug Therapy" OR "Affinity Labels" OR "Food Labeling" OR "Isotope Labeling" OR "Staining and Labeling" OR "In Situ Nick-End Labeling" OR "Primed In Situ Labeling" OR TI Rat OR TI Rats OR TI Mice OR TI Mouse OR TI Placebo OR "Drug effects.hw" OR TI Drug OR TI Drugs OR TI "Off Label" OR AB "Off Label" OR Food AND TI "Drug Administration" OR TI "Food labeling" OR TI "Calorie labeling" OR TI Injection OR TI Cigarette))))

# BMJ Open

## Consequences of health condition labelling: protocol for a systematic scoping review

|                                 |                                                                                                                                                                                                                                                                                                                                                                                                                                                                                                                                                    |
|---------------------------------|----------------------------------------------------------------------------------------------------------------------------------------------------------------------------------------------------------------------------------------------------------------------------------------------------------------------------------------------------------------------------------------------------------------------------------------------------------------------------------------------------------------------------------------------------|
| Journal:                        | <i>BMJ Open</i>                                                                                                                                                                                                                                                                                                                                                                                                                                                                                                                                    |
| Manuscript ID                   | bmjopen-2020-037392.R2                                                                                                                                                                                                                                                                                                                                                                                                                                                                                                                             |
| Article Type:                   | Protocol                                                                                                                                                                                                                                                                                                                                                                                                                                                                                                                                           |
| Date Submitted by the Author:   | 24-Aug-2020                                                                                                                                                                                                                                                                                                                                                                                                                                                                                                                                        |
| Complete List of Authors:       | Sims, Rebecca; Bond University Faculty of Health Sciences and Medicine, Institute for Evidence-Based Healthcare<br>Kazda, Luise; The University of Sydney, Sydney School of Public Health<br>Michaleff, Zoe; Bond University Faculty of Health Sciences and Medicine, Institute for Evidence-Based Healthcare<br>Glasziou, Paul; Bond University Faculty of Health Sciences and Medicine, Institute for Evidence-Based Healthcare<br>Thomas, Rae; Bond University Faculty of Health Sciences and Medicine, Institute for Evidence-Based Healthcare |
| <b>Primary Subject Heading</b>: | Public health                                                                                                                                                                                                                                                                                                                                                                                                                                                                                                                                      |
| Secondary Subject Heading:      | Public health                                                                                                                                                                                                                                                                                                                                                                                                                                                                                                                                      |
| Keywords:                       | PUBLIC HEALTH, QUALITATIVE RESEARCH, Quality in health care < HEALTH SERVICES ADMINISTRATION & MANAGEMENT                                                                                                                                                                                                                                                                                                                                                                                                                                          |
|                                 |                                                                                                                                                                                                                                                                                                                                                                                                                                                                                                                                                    |

SCHOLARONE™  
Manuscripts



I, the Submitting Author has the right to grant and does grant on behalf of all authors of the Work (as defined in the below author licence), an exclusive licence and/or a non-exclusive licence for contributions from authors who are: i) UK Crown employees; ii) where BMJ has agreed a CC-BY licence shall apply, and/or iii) in accordance with the terms applicable for US Federal Government officers or employees acting as part of their official duties; on a worldwide, perpetual, irrevocable, royalty-free basis to BMJ Publishing Group Ltd ("BMJ") its licensees and where the relevant Journal is co-owned by BMJ to the co-owners of the Journal, to publish the Work in this journal and any other BMJ products and to exploit all rights, as set out in our [licence](#).

The Submitting Author accepts and understands that any supply made under these terms is made by BMJ to the Submitting Author unless you are acting as an employee on behalf of your employer or a postgraduate student of an affiliated institution which is paying any applicable article publishing charge ("APC") for Open Access articles. Where the Submitting Author wishes to make the Work available on an Open Access basis (and intends to pay the relevant APC), the terms of reuse of such Open Access shall be governed by a Creative Commons licence – details of these licences and which [Creative Commons](#) licence will apply to this Work are set out in our licence referred to above.

Other than as permitted in any relevant BMJ Author's Self Archiving Policies, I confirm this Work has not been accepted for publication elsewhere, is not being considered for publication elsewhere and does not duplicate material already published. I confirm all authors consent to publication of this Work and authorise the granting of this licence.

1  
2  
3 1  
4  
5 2  
6  
7 3  
8  
9 4 **Consequences of health condition labelling: protocol for a systematic scoping review**  
10  
11 5  
12 6  
13  
14 7  
15  
16 8  
17 9

18  
19 10 Rebecca Sims<sup>1</sup>, Luise Kazda<sup>2</sup>, Zoe A Michaleff<sup>1</sup>, Paul Glasziou<sup>1</sup>, Rae Thomas<sup>1</sup>  
20  
21 11

22 12  
23  
24 13  
25  
26 14  
27 15 <sup>1</sup>Institute for Evidence-Based Healthcare (IEBH), Bond University

28  
29 16 <sup>2</sup>Sydney School of Public Health, Faculty of Medicine and Health, The University of Sydney  
30  
31 17

32 18  
33  
34 19  
35  
36 20 Corresponding author: Rae Thomas, Institute for Evidence-Based Healthcare (IEBH), Bond  
37  
38 21 University, 14 University Drive, Robina QLD 4226. Email: [rthomas@bond.edu.au](mailto:rthomas@bond.edu.au)  
39  
40 22

41 23  
42  
43 24 **Keywords:** *labelling; diagnosis; consequences*  
44  
45 25

46 26 **Word Count:** 2179  
47  
48 27  
49  
50 28  
51  
52 29  
53  
54 30  
55  
56  
57  
58  
59  
60

## ABSTRACT

**Introduction.** When health conditions are labelled it is often to classify and communicate a set of symptoms. While diagnostic labelling can provide explanation for an individual's symptoms, it can also impact how individuals and others view those symptoms. Despite existing research regarding the effects of labelling health conditions, a synthesis of these effects has not occurred. We will conduct a systematic scoping review to synthesise the reported consequences and impact of being given a label for a health condition from an individual, societal and health practitioner perspective and explore in what context labelling of health conditions is considered important.

**Methods and analysis.** The review will adhere to the Joanna Briggs Methodology for Scoping Reviews. Searches will be conducted in five electronic databases (PubMed, Embase, PsychINFO, Cochrane, CINAHL). Reference lists of included studies will be screened and forward and backward citation searching of included articles will be conducted. We will include reviews and original studies which describe the consequences for individuals labelled with a non-cancer health condition. We will exclude hypothetical research designs and studies focussed on the consequences of labelling cancer conditions, intellectual disabilities, and/or social attributes. We will conduct thematic analyses for qualitative data and descriptive or meta-analyses for quantitative data where appropriate.

**Ethics and dissemination.** Ethical approval is not required for a scoping review. Results will be disseminated via publication in a peer-reviewed journal, conference presentations, and lay-person summaries on various online platforms. Findings from this systematic scoping review will identify gaps in current understanding of how, when, why, and for whom a diagnostic label is important and inform future research.

1  
2  
3 **1 Strengths and limitations of this study**  
4  
5

- 6 2 - A broad, comprehensive search strategy will be conducted in 5 electronic databases.  
7  
8 3 - We will include both qualitative and quantitative studies which will enhance our  
9  
10 current understanding of the consequences of health condition labelling.  
11 4  
12  
13 5 - Two reviewers will screen 10% of titles and abstracts, extract data and assess quality  
14  
15 6 of included studies.  
16  
17 7 - Eligibility will not be limited to specific health conditions, therefore, the  
18  
19 consequences identified will be generalisable to health condition labelling more  
20 8  
21 broadly.  
22 9  
23  
24 10 - Articles will be limited to peer-reviewed publications and not include grey or theory-  
25  
26 based literature.  
27 11  
28  
29  
30 12



## INTRODUCTION

The diagnosis of physical and psychological health conditions is increasing in prevalence.<sup>1-5</sup> Diagnoses often occur in the context of individuals seeking to identify and treat symptoms. However, diagnoses can also occur as a result of screening tests where individuals have no discernible signs or symptoms of disease (such as when a routine test determines an individual has hypertension)<sup>6</sup>, from unanticipated findings in investigations for other health concerns (such as identifying an anomaly in a person's thyroid when conducting an MRI of the spine),<sup>7</sup> or, when people are newly diagnosed with a health condition because of changes to diagnostic thresholds or cut-offs for the condition opposed to changes in individual circumstances (such as for gestational diabetes).<sup>1</sup> The value of a diagnosis, particularly in these latter contexts, is not always evident and the risk of over- and mis-diagnosis is significant.<sup>1 8 9</sup>

Diagnostic labels provide healthcare professionals with a framework from which to organise and interpret clinical symptom presentations, support clinical decision making through directing treatment decisions, and provide information on possible condition course and overall prognosis.<sup>10 11</sup> Further, diagnostic labels allow clinicians to assume homogeneity amongst members of patient groups, in addition to providing an efficient method for health professionals to communicate.<sup>12</sup>

Despite well-meaning intentions, application of diagnostic labels in real-world practice can be problematic. Diagnostic criteria can often be ambiguous. For example, symptoms of anxiety, such as restlessness, fatigue, or difficulty concentrating, may be explained by diagnoses of anxiety, depressive, or bipolar and related disorders.<sup>13 14</sup> Similarly, chest pain symptoms may be explained by several alternative diagnostic categories such as inflammatory diseases, musculoskeletal conditions, or coronary diseases.<sup>15 16</sup> Lastly, non-

1 specific low back pain is the leading cause of disability worldwide, yet for the majority of  
2 people no pathoanatomical cause can be identified.<sup>17</sup>

3 From the perspective of a patient, a diagnostic label can have a significant impact  
4 (negative and positive) on their health outcomes, psychological wellbeing, and behaviour,  
5 and can influence how they are viewed and managed by healthcare professionals and are  
6 perceived by other members in society (e.g. school, workplace).<sup>3 5 18</sup> In a cohort of over  
7 33,000 adults, individuals who were aware that they had hypertension reported elevated  
8 levels of psychological distress compared to those individuals who had hypertension,  
9 however, were unaware of this.<sup>3</sup> A study investigating the impact of labelling borderline  
10 personality disorder on clinician interpretation of patient symptoms found clinicians' prior  
11 awareness of a diagnosis of borderline personality disorder, compared to no awareness,  
12 resulted in a tendency to frame observations of the individual in terms of the label, and a  
13 failure to observe positive behaviours.<sup>12</sup>

14 Conversely, a diagnostic label may have positive effects on the individual. These  
15 include timely referral to necessary healthcare which, in turn, can reduce morbidity and  
16 mortality, improve predictions regarding condition progression as well as facilitate access to  
17 support, services and resources (for example, diagnosis based school funding<sup>19 20</sup> and social  
18 support<sup>5</sup>) and provide an explanation and validation of an individual's signs and symptoms.  
19 A recent study exploring the impact of chronic fatigue syndrome using hypothetical scenarios  
20 of a close friend's diagnosis reported a label of chronic fatigue, compared with no label,  
21 elicited higher sympathetic responses from participants, greater potential social support, and  
22 greater support for active treatment.<sup>5</sup>

23 The terms used to describe a diagnostic label have been found to influence an  
24 individual's behaviour, psychological well-being and treatment preferences. Specifically, a  
25 diagnostic label that uses medicalised and precise terminology compared with a description

1  
2  
3 1 of symptoms has been found to result in higher patient anxiety, greater perceived severity of  
4  
5 2 the condition and a patient preference of more invasive treatments.<sup>18 21-23</sup> This has been  
6  
7 3 evidenced in conditions including gastro-oesophageal reflux disease, polycystic ovary  
8  
9 4 syndrome, bone fracture, and low back pain.<sup>18 21-23</sup> Similarly, research suggests that patients  
10  
11 5 diagnosed with diabetes demonstrate a propensity to medical interventions, including insulin  
12  
13 6 use, oral medication taking, and blood glucose monitoring, compared to less invasive  
14  
15 7 interventions, such as changes to diet and exercise practices.<sup>24</sup> The use of a medicalised label  
16  
17 8 over a descriptive label for a health condition is also suggested to result in increased  
18  
19 9 confidence in the medical professional and greater adoption of sick role behaviour.<sup>25</sup>  
20  
21 10 Alternatively, use of descriptive labels for health conditions was found to be associated with  
22  
23 11 greater patient ownership of the condition.<sup>25</sup>

24  
25  
26  
27  
28 12 To date, our understanding of the consequences and impacts of a diagnostic label has  
29  
30 13 been limited to a single perspective (e.g. patient, health care practitioner), single condition  
31  
32 14 (e.g. gastro-oesophageal reflux disease), or restricted to a specific study design (e.g.  
33  
34 15 hypothetical research design) and a comprehensive synthesis of this information across health  
35  
36 16 conditions is lacking.<sup>26 27</sup> Further, exploring the real world impact of a diagnostic label  
37  
38 17 including benefits and harms has received little attention.<sup>22 28 29</sup> Therefore, the aims of this  
39  
40 18 systematic scoping review are to systematically review original and synthesised research  
41  
42 19 exploring the consequences of being given a label for a health condition to:  
43  
44  
45

- 46 20 1. Identify the range of potential consequences of labelling of health conditions from an  
47  
48 21 individual, societal, and health practitioner viewpoint;
- 49  
50 22 2. Explore why, for whom, and in what contexts labelling of health conditions is, or is not,  
51  
52 23 influential; and,
- 53  
54 24 3. Evaluate the methods used to study the impact of labelling health conditions.  
55  
56  
57  
58  
59  
60

## METHODS AND ANALYSIS

Scoping reviews are suggested as an alternative to systematic reviews, allowing for a broader examination and synthesis of existing research and identification of research gaps.<sup>30</sup> The proposed systematic scoping review will adhere to the Joanna Briggs Methodology for Scoping Reviews,<sup>31</sup> and adhere to the Preferred Reporting Items for Systematic Reviews and Meta-Analyses Extension for Scoping Reviews (PRISMA-ScR).<sup>32</sup> This approach was selected to allow sufficient documentation of the review process. An initial search was conducted in August 2019 to pilot the screening process and data extraction spreadsheet. The review is expected to be complete by October 2020.

### Consumer involvement in scoping review design and framework development

A convenience sampling survey was conducted to explore the public's opinion of the consequences of diagnostic label for health conditions. In April 2019, we posted the questions "What are the labelling consequences of being given a health diagnosis? We're working up a list and so far we have: anxiety, relief, more tests, stigma, medico-legal problems. What else?" on two social media platforms, Facebook and Twitter. Responses on Facebook included 14 comments from six individuals, while Twitter responses resulted in 45 comments from 40 individuals. The results of this survey were used to inform the development of the search strategy, inclusion and exclusion criteria, data extraction form, and an initial qualitative framework (Table 1) that will be used in this scoping review.

Table 1. Coding Framework of Social Media Responses.

| Name                 | Description                       | Examples                                                                                                                                                      |
|----------------------|-----------------------------------|---------------------------------------------------------------------------------------------------------------------------------------------------------------|
| Psychological Impact | Psychological impact of diagnosis | <ul style="list-style-type: none"> <li>- Increased self-understanding</li> <li>- Stigma (internalised stigma (self); perceived stigma from others)</li> </ul> |

|             |            |                                                                                     |                                                                                                                                                                                                                       |
|-------------|------------|-------------------------------------------------------------------------------------|-----------------------------------------------------------------------------------------------------------------------------------------------------------------------------------------------------------------------|
|             |            |                                                                                     | <ul style="list-style-type: none"> <li>- Increased psychological distress (anxiety, depression, phobia, worry, fear, stress)</li> </ul>                                                                               |
| Support     |            | Support gained or loss as a result of diagnosis                                     | <ul style="list-style-type: none"> <li>- Support groups: Increased support of others with similar diagnosis; network with other patients</li> <li>- Others less respectful, more withdrawn and judgemental</li> </ul> |
| Development | Education  | Seeking to become more informed on diagnoses, testing, intervention                 | <ul style="list-style-type: none"> <li>- Increase in health literacy due to motivation to find about treatment options</li> </ul>                                                                                     |
|             | Planning   | Forward planning and decision making as a result of diagnosis                       | <ul style="list-style-type: none"> <li>- Ability to plan – even if there may not be treatment, provides opportunity to get affairs in order (e.g. wills).</li> </ul>                                                  |
| Lifestyle   | Behaviour  | Behaviour changes as a result of diagnosis                                          | <ul style="list-style-type: none"> <li>- Change diet</li> <li>- Change lifestyle</li> </ul>                                                                                                                           |
|             | Employment | Effect of diagnosis on employment                                                   | <ul style="list-style-type: none"> <li>- More Sick days; Time off work; absenteeism</li> </ul>                                                                                                                        |
|             | Financial  | Effect of diagnosis on finances                                                     | <ul style="list-style-type: none"> <li>- Diagnosis provides access to funds (e.g. Medicare, NDIS, insurance)</li> </ul>                                                                                               |
| Service Use | Testing    | Further assessment and tests as a result of diagnosis (including testing of family) | <ul style="list-style-type: none"> <li>- Seeking more investigations</li> <li>- Scans and imaging</li> <li>- Encourages screening of other family members at low-risk of the condition</li> </ul>                     |
|             | Treatment  | Treatment and intervention as a result of diagnosis                                 | <ul style="list-style-type: none"> <li>- Clear Treatment path; clearer treatment protocols</li> <li>- Side-effects (of medication sexual, agitation, suicidality, emotional numbing)</li> </ul>                       |

## 1 Inclusion criteria

2 Peer reviewed publications including systematic or literature reviews and original  
 3 studies which describe the perceived consequences for individuals labelled with a non-cancer  
 4 health condition will be included. Perceived consequences can be reported from the  
 5 perspectives of the individuals, their family, friends, and/or carers, or health professionals.  
 6 As we expect individuals labelled as having a cancer condition will have different  
 7 experiences to those labelled with general health conditions, studies that focus on these  
 8 samples are excluded. Similarly, studies that report the consequence of labels for people  
 9 using hypothetical case scenarios, or individuals with intellectual disabilities and/or social  
 10 attributes such as race, sexual identity or orientation will also be excluded (see Table 2 for  
 11 more details).

12 Table 2. Inclusion Criteria

| Aspect           | Inclusion Criteria                                                                                                                                                                                                                                         | Exclusion Criteria                                                                                                                                                                                         |
|------------------|------------------------------------------------------------------------------------------------------------------------------------------------------------------------------------------------------------------------------------------------------------|------------------------------------------------------------------------------------------------------------------------------------------------------------------------------------------------------------|
| Types of studies | Original Studies (Cohort, Case-Controlled, Cross-Sectional, Observational, RCT, Focus Groups)*<br>Synthesised Studies (Systematic Reviews)<br><i>*Studies utilising qualitative methodologies do not require multiple group comparisons for inclusion.</i> | Protocols (final study to be sourced)<br>Opinion pieces and commentaries<br>Quantitative Cohort, Case-Controlled, and Cross-Sectional studies without comparator<br>Hypothetical or vignette based studies |

|              |                                                                                                                                                                                                                                                                                                                                                  |                                                                                                                                                                                                                                                                                                                                                                                                         |
|--------------|--------------------------------------------------------------------------------------------------------------------------------------------------------------------------------------------------------------------------------------------------------------------------------------------------------------------------------------------------|---------------------------------------------------------------------------------------------------------------------------------------------------------------------------------------------------------------------------------------------------------------------------------------------------------------------------------------------------------------------------------------------------------|
| Participants | Individuals, no age limit (e.g. adults, children, family, carers, health professionals, general public)                                                                                                                                                                                                                                          | Animal subjects                                                                                                                                                                                                                                                                                                                                                                                         |
| Condition    | <p>Screening and/or labelling of physical or psychological health condition/s</p> <p>Self-reported (e.g. response to questions such as “has your GP ever told you that you have hypertension?”)</p> <p>Health condition confirmed (e.g. medical examination and testing completed as part of the study)</p>                                      | <p>Labelling of intellectual impairment, race, ethnicity, sexual identity or sexual orientation</p> <p>Labelling of cancers and cancer related conditions</p> <p>Self-reported conditions provided by unqualified professional (e.g. physiotherapist telling patient they have hypertension)</p> <p>Self-identified conditions (e.g. googling of symptoms, no confirmation by medical professional)</p> |
| Outcomes     | <p>Consequences, impact, effects of the health condition label or diagnosis</p> <p>Perceived harms and/or benefits (e.g. illness burden)</p> <ul style="list-style-type: none"> <li>- Lived experience</li> <li>- Psychological impact (e.g. anxiety, quality of life)</li> <li>- Behaviour change (e.g. participation in employment)</li> </ul> | <p>Effect of the health condition (e.g. disease mechanisms/traits)</p> <p>Gene labelling</p> <p>Food or nutrition labelling</p> <p>Drug effects/effectiveness</p> <p>Intervention effects/effectiveness (e.g. intervention A vs intervention B)</p>                                                                                                                                                     |

|          |                                            |   |
|----------|--------------------------------------------|---|
|          | - Support (e.g. financial, social support) |   |
| Language | No language limitations                    | - |
| Date     | No date limitations                        | - |

## Search strategy

A structured search, developed in collaboration with an information specialist, of five electronic databases (PubMed, Embase, PsycINFO, Cochrane, CINAHL) will be conducted to identify relevant publications. Databases will be searched from their inception.

Preliminary searches were conducted in August 2019 and will be updated in June 2020.

Reference lists of included articles will be searched and forward citation searching of included articles will be conducted. The full search strategy to be used is reported in the Supplementary Material.

## Study selection

Titles and abstracts of 10% of articles retrieved through electronic and manual searches will be independently screened by two reviewers (RS and LK) for eligibility against the pre-specified inclusion criteria. Disagreements will be resolved through discussion and consultation with additional reviewers as required. When interrater reliability (Kappa) >0.8 is achieved for the screened studies, remaining studies will continue to be screened by one reviewer (RS). Articles identified as unclear for inclusion will be reviewed by an additional reviewer as required.



## 1 **Data extraction and framework revision and validation**

2 Full text publications will be obtained, and the reference list reviewed. Any relevant  
3 studies found in the reference list will be screened (RS) for inclusion against the same  
4 inclusion criteria. Additional uncertainties regarding eligibility for inclusion will be resolved  
5 through discussion with other reviewers (RT or PG). Two reviewers (RS and ZAM) will  
6 independently extract study data from 10% of included qualitative studies and 10% of  
7 included quantitative studies using a standardised data extraction form that will be piloted  
8 prior to use. Conflicts will be resolved by a third party as required. Once interrater reliability  
9 (Kappa) >0.8 is achieved for extracted data, one reviewer (RS) will undertake the remaining  
10 data extraction in a staged process, with this detailed below in the *extraction* sections. The  
11 same staged process will be used when extracting data from quantitative and qualitative  
12 studies. Queries will be resolved through discussion with a second reviewer (ZAM).

13 The methods used to extract and synthesise the results of qualitative and quantitative  
14 studies are based on the meta-analytic techniques described by Sandelowski, Barroso and  
15 Voils,<sup>33</sup> Thomas and Harden,<sup>34</sup> and Timulak.<sup>35</sup> Extracted data will include study  
16 characteristics (author, journal, year of publication, study country and setting), participant  
17 characteristics (number of participants, age, health condition), and quantitative or qualitative  
18 outcomes (consequences, impact, effects of the diagnostic label).

### 19 *Qualitative data extraction*

20 Data for thematic analysis will be extracted from the published study and include the  
21 authors abstracted themes and relevant, supporting quotes, reported in the primary study.  
22 Direct quotes will not be extracted in isolation to ensure data “retains its meaning” and is not  
23 interpreted or extracted out of context of the primary study. This qualitative meta-analysis

1 technique has been described by Sandelowski, Barroso and Voils,<sup>33</sup> Thomas and Harden,<sup>34</sup>  
2 and Timulak.<sup>35</sup>

### 3 *Quantitative data extraction*

4 For studies with quantitative outcomes, extracted data will include, the text and  
5 numerical data from the results section reporting primary outcomes.<sup>36</sup> Examples of potential  
6 quantitative measures include the Short Form Health Survey (SF-36),<sup>37</sup> General Health  
7 Questionnaire (GHQ),<sup>38</sup> or work absenteeism.

### 8 *Qualitative data analysis*

9 The coding framework developed from social media responses will be iteratively  
10 revised using eligible studies retrieved by the electronic database search. Qualitative data  
11 will initially be extracted from a random sample of one-third of included qualitative studies  
12 and mapped to the coding framework. This framework will be expanded as additional  
13 themes emerge. A second third of included qualitative studies will be randomly selected,  
14 data extracted and mapped to the updated coding framework until data thematic saturation  
15 has been achieved. If new themes are still emerging at this point, the remaining third of  
16 qualitative studies will be analysed against the developed framework. Data saturation will be  
17 defined using indicative thematic saturation, which states data saturation as the non-  
18 emergence of new codes or themes that will result in expansion or revision of the coding  
19 framework.<sup>36</sup>

### 20 *Quantitative data analysis*

21 Quantitative data will be summarised narratively.<sup>33</sup> For example, we will collate data  
22 from studies that used the SF-36, GHQ, or absenteeism and summarise the findings reported  
23 in the results section. Unlike the large volume of expected qualitative studies, fewer  
24 quantitative studies with comparators are expected. Therefore, outcomes from all of the

1  
2  
3 1 included quantitative studies will be extracted and, if possible, tabulated by condition and  
4  
5 2 outcomes.  
6  
7  
8  
9 3

#### 10 4 **Patient and public involvement**

11  
12  
13 5 This scoping review has no direct patient involvement.  
14  
15 6

### 17 7 **PRESENTATION OF RESULTS**

18  
19  
20  
21 8 We will present study selection in a flow diagram according to PRISMA-Scr and  
22  
23 9 included studies will be described in a table of characteristics.<sup>32</sup> Results will be aggregated as  
24  
25 10 appropriate. Results pertinent to the consequences of labelling of health conditions will be  
26  
27 11 collated to expand those provided in Table 1, with empirical data regarding rate and severity  
28  
29 12 of these consequences also examined. Additionally, a compendium of methods used to elicit  
30  
31 13 consequences of health condition labelling will be developed and methodology appraised.  
32  
33 14 For quantitative studies, extracted data will be tabulated in a descriptive and/or statistical  
34  
35 15 manner depending on the availability of data (i.e. number of studies reporting similar  
36  
37 16 outcome measures or measurement of similar constructs, such as quality of life or symptoms  
38  
39 17 of anxiety) and degree of heterogeneity between studies (e.g. population, clinical conditions).  
40  
41 18 Should data not support a meta-analysis, results from studies which provide quantitative data  
42  
43 19 will be reported in a narrative synthesis and interpreted alongside results from qualitative  
44  
45 20 studies. Qualitative data will be analysed using developed frameworks (see Table 1), and  
46  
47 21 following established protocols for the qualitative analysis of information in the social  
48  
49 22 sciences.<sup>39</sup> The characteristics and results of all included studies will be reported in tables  
50  
51 23 and summarised in text.  
52  
53  
54  
55  
56  
57  
58  
59 24  
60

1  
2  
3 **1 Ethics and Dissemination**  
4

5 2 As the current study is a systematic scoping review protocol, ethics is not required.  
6

7  
8 3 Dissemination of results will be made public via peer-reviewed publications, conference  
9

10 4 presentations and lay-person summaries on various on-line platforms (e.g. The  
11

12 5 Conversation).  
13  
14  
15 6  
16  
17  
18 7  
19  
20  
21  
22  
23  
24  
25  
26  
27  
28  
29  
30  
31  
32  
33  
34  
35  
36  
37  
38  
39  
40  
41  
42  
43  
44  
45  
46  
47  
48  
49  
50  
51  
52  
53  
54  
55  
56  
57  
58  
59  
60

For peer review only

## REQUIRED STATEMENTS

**Twitter:** Rebecca Sims @BecSims90, Luise Kazda @LuiseKazda, Zoe A Michaleff @ZoeMichaleff, Paul Glasziou @PaulGlasziou, Rae Thomas @rthomasEBP

**Acknowledgements:** The authors thank Justin Clark, Senior Research Information Specialist at the Institute for Evidence-Based Healthcare, Bond University for assistance with constructing the search strategy.

**Author Contributions:** RS, PG, and RT contributed to the conception and design of the protocol, initial public ‘survey’ and construction of the search terms. RS, LK, and ZAM contributed to screening and data analysis. RS, ZAM, RT, and PG contributed to the drafting of the manuscript and all authors approved the final version.

**Funding:** RS is supported by an Australian Government Research Training Program Scholarship. RT and ZAM are supported by a National Health and Medical Research Council Program grant (#1106452). LK is supported by a Centres of Research Excellence Grant (#1104136). PG is supported by a NHMRC Research Fellowship (#1080042). The funding sources have no role in study design, data collection, data analysis, data interpretation, or writing of the report.

**Competing Interests:** None declared.

**Patient consent for publication:** Not required.

**Orcid iDs:** Rebecca Sims <https://orcid.org/0000-0002-1604-8354>

Luise Kazda <http://orcid.org/0000-0003-4105-0402>

Zoe A Michaleff <https://orcid.org/0000-0002-0360-4956>

Paul Glasziou <https://orcid.org/0000-0001-7564-073X>

Rae Thomas <http://orcid.org/0000-0002-2165-5917>

## REFERENCES

1. Sexton H, Heal C, Banks J, et al. Impact of new diagnostic criteria for gestational diabetes. *J Obstet Gynaecol Res* 2018;44:425-31. doi: 10.1111/jog.13544.
2. Australian Bureau of Statistics. National Health Survey: First Results, 2017-18. Web site: <https://www.abs.gov.au/ausstats/abs@.nsf/mf/4364.0.55.001>. Updated May 27, 2019. Accessed November 30, 2019.
3. Hamer M, Batty GD, Stamatakis E, Kivimaki M. Hypertension awareness and psychological distress. *Hypertens* 2010;56:547-50. doi: 10.1161/hypertensionaha.110.153775.
4. Thombs BD, Kwakkenbos L, Levis AW, Benedetti A. Addressing overestimation of the prevalence of depression based on self-report screening questionnaires. *Can Med Assoc J* 2018;190:E44. doi: 10.1503/cmaj.170691.
5. Noble S, Bonner C, Hersch J, Jansen J, McGeechan K, McCaffery K. Could disease labelling have positive effects? An experimental study exploring the effect of the chronic fatigue syndrome label on intended social support. *Patient Educ Couns* 2019;102:486-93. doi: 10.1016/j.pec.2018.10.011.
6. Walker MJ, Rogers WA. Diagnosis, narrative identity, and asymptomatic disease. *Theor Med Bioeth* 2017;38:307-21. doi: 10.1007/s11017-017-9412-1.
7. Hiremath SB, Boto J, Regnaud A, Etienne L, Fitsiori A, Vargas MI. Incidentalomas in spine and spinal cord imaging. *Clin Neuroradiol* 2019;29:191-213. doi: 10.1007/s00062-019-00773-5.
8. Doust J, Glasziou P. Is the problem that everything is a diagnosis? *Aust Fam Physician* 2013;42:856-9.
9. Brodersen J, Schwartz LM, Heneghan C, O'Sullivan JW, Aronson JK, Woloshin S. Overdiagnosis: what it is and what it isn't. *BMJ Evid Based Med* 2018;23:1-3. doi: 10.1136/ebmed-2017-110886.
10. Frances A, First M, Pincus HA, Widiger T, Davis W. An introduction to DSM-IV. *Hosp Community Psychiatry* 1990;41:493-95.
11. Croft P, Altman DG, Deeks JJ, et al. The science of clinical practice: disease diagnosis or patient prognosis? Evidence about "what is likely to happen" should shape clinical practice. *BMC Med* 2015;13:20. doi: 10.1186/s12916-014-0265-4.
12. Lam DC, Poplavskaya EV, Salkovskis PM, Hogg LI, Panting H. An experimental investigation of the impact of personality disorder diagnosis on clinicians: can we see past the borderline? *Behav Cogn Psychother* 2016;44:361-73. doi: 10.1017/s1352465815000351.
13. Allsopp K, Read J, Corcoran R, Kinderman P. Heterogeneity in psychiatric diagnostic classification. *Psychiatry Res* 2019;279:15-22. doi: 10.1016/j.psychres.2019.005.
14. American Psychological Association. *Diagnostic and Statistical Manual for Mental Disorders, Fifth Edition*. Washington, D.C.: American Psychiatric Association, 2013.
15. Christiansen J. Less is more: chest pain pathways in clinical care. *Med J Aust* 2017;207:193-94. doi: 10.5694/mja17.00331
16. Sturm C, Witte T. Musculoskeletal-related chest pain. *Der Internist* 2017;58:39-46. doi: 10.1007/s00108-016-0166-z.
17. Hartvigsen J, Hancock MJ, Kongsted A, et al. What low back pain is and why we need to pay attention. *Lancet* 2018;391:2356-67. doi: 10.1016/s0140-6736(18)30480-x.
18. Scherer LD, Zikmund-Fisher BJ, Fagerlin A, Tarini BA. Influence of "GERD" label on parents' decision to medicate infants. *Pediatr* 2013;131:839-45. doi: 10.1542/peds.2012-3070.

19. Parliament of Australia. Access to real learning: the impact of policy, funding and culture on students with disability. [https://www.aph.gov.au/Parliamentary\\_Business/Committees/Senate/Education\\_and\\_Employment/students\\_with\\_disability/Report](https://www.aph.gov.au/Parliamentary_Business/Committees/Senate/Education_and_Employment/students_with_disability/Report). Published 2016. Accessed November 30, 2019.
20. Witham M. Funding the need not the label. Presented at: AARE Conference; 2015; Western Australia, Australia.
21. Nickel B, Barratt A, Copp T, Moynihan R, McCaffery K. Words do matter: a systematic review on how different terminology for the same condition influences management preferences. *BMJ Open* 2017;7:e014129. doi: 10.1136/bmjopen-2016-014129.
22. Copp T, McCaffery K, Azizi L, Doust J, Mol BWJ, Jansen J. Influence of the disease label 'polycystic ovary syndrome' on intention to have an ultrasound and psychosocial outcomes: a randomised online study in young women. *Hum Reprod* 2017;32:876-84. doi: 10.1093/humrep/dex029.
23. O'Keefe M. Do different diagnostic labels for low back pain influence management preferences: an online randomised controlled study. Presented at: Preventing Overdiagnosis Conference; December 5, 2019; Sydney, Australia.
24. Kavookjian J, Berger BA, Grimley DM, Villaume WA, Anderson HM, Barker KN. Patient decision making: strategies for diabetes diet adherence intervention. *Res Social Adm Pharm* 2005;1:389-407. doi: 10.1016/j.sapharm.2005.06.006.
25. Ogden J, Branson R, Bryett A, et al. What's in a name? An experimental study of patients' views of the impact and function of a diagnosis. *Fam Pract* 2003;20:248-53.
26. Macdonald LA, Sackett DL, Haynes RB, Taylor DW. Labelling in hypertension: A review of the behavioural and psychological consequences. *J Chronic Dis* 1984;37:933-42. doi: 10.1016/0021-968190070-5.
27. Cotter AR, Vuong K, Mustelin LL, et al. Do psychological harms result from being labelled with an unexpected diagnosis of abdominal aortic aneurysm or prostate cancer through screening? A systematic review. *BMJ Open* 2017;7:e017565. doi: 10.1136/bmjopen-2017-017565.
28. Betsch TA, Gorodzinsky AY, Finley GA, et al. What's in a name? Health care providers' perceptions of pediatric pain patients based on diagnostic labels. *Clin J Pain* 2017;33:694-98. doi: 10.1097/ajp.0000000000000454.
29. Lancaster AM. *Impact of diagnostic versus emotional disturbance label on preservice teacher expectations of student academic, behavior, and social outcomes* [PhD Thesis]. Mississippi: Mississippi State University; 2016.
30. Arksey H, O'Malley L. Scoping studies: towards a methodological framework. *Int J Soc Res Methodol* 2005;8:19-32. doi: 10.1080/1364557032000119616.
31. Peters M, Godfrey C, McInerney P, Soares CB, Khalil H, Parker D. In: Aromataris E, Munn Z, eds. *Joanna Briggs Institute review's manual*. The Joanna Briggs Institute, 2017.
32. Tricco AC, Lillie E, Zarin W, et al. PRISMA extension for scoping reviews (PRISMA-ScR): checklist and explanation. *Ann Intern Med* 2018;169:467-73.
33. Sandelowski M, Barroso J, Voils CI. Using qualitative metasummary to synthesize qualitative and quantitative descriptive findings. *Res Nurs Health* 2007;30:99-111. doi: 10.1002/nur.20176.
34. Thomas J, Harden A. Methods for the thematic synthesis of qualitative research in systematic reviews. *BMC Med Res Methodol* 2008;8:45. doi: 10.1186/1471-2288-8-45.



- 1  
2  
3 1 35. Timulak L. Meta-analysis of qualitative studies: a tool for reviewing qualitative research  
4 2 findings in psychotherapy. *Psychother Res* 2009;19:591-600. doi:  
5 3 10.1080/10503300802477989.  
6 4 36. Saunders B, Sim J, Kingstone T, et al. Saturation in qualitative research: exploring its  
7 5 conceptualization and operationalization. *Qual Quant* 2018;52:1893-907. doi:  
8 6 10.1007/s11135-017-0574-8.  
9 7 37. Ware J, Sherbourne C. The MOS 36-item short-form health survey (SF-36). conceptual  
10 8 framework and item selection. *Med Care* 1992;30:473-83.  
11 9 38. Goldberg D, Williams P. A user's guide to the General Health Questionnaire. Windsor,  
12 10 Berks: NFER-Nelson. 1988.  
13 11 39. Ritchie J, Lewis J, McNaughton Nicholls C, Ormston R, eds. *Qualitative Research*  
14 12 *Practice: A Guide for Social Science Students and Researchers*. 2nd ed. London, UK:  
15 13 Sage Publications Ltd. 2014.  
16  
17  
18  
19  
20  
21  
22  
23  
24  
25  
26  
27  
28  
29  
30  
31  
32  
33  
34  
35  
36  
37  
38  
39  
40  
41  
42  
43  
44  
45  
46  
47  
48  
49  
50  
51  
52  
53  
54  
55  
56  
57  
58  
59  
60



Supplementary Material  
Search Strategies

**PubMed**

(Health[tiab] OR Illness[tiab] OR Disorder[tiab] OR Condition[tiab] OR Disease[tiab])

AND

((Psychological[ti] OR Label[tiab] OR Labelling[tiab] OR Labeling[tiab]) AND  
(Diagnosis[tiab] OR Diagnostic[tiab] OR Screening[Mesh] OR Screening[tiab] OR  
Screened[tiab]))

AND

(Patient[tiab] OR Patients[tiab] OR Individuals[tiab] OR Self[tiab] OR Parent[tiab] OR  
Family[tiab] OR Adult[tiab] OR Men[tiab] OR Women[tiab])

AND

(Attitude[Mesh] OR Awareness[tiab] OR Stigma[tiab] OR Beliefs[tiab] OR Well-being[tiab]  
OR Wellbeing[tiab] OR Meaning[tiab] OR Impact[tiab] OR Effect[tiab] OR Effects[tiab] OR  
Influence[tiab] OR Experience[tiab])

AND

("Systematic review"[tiab] OR "Systematic Review"[pt] OR "Cochrane Database Syst  
Rev"[ta] OR "meta analysis"[pt] OR "meta analysis"[tiab] OR ((Search[tiab] OR  
Searched[tiab] OR Searches[tiab]) AND (PubMed[tiab] OR Medline[tiab] OR Database[tiab]  
OR Databases[tiab])) OR "randomized controlled trial"[pt] OR "controlled clinical trial"[pt]  
OR randomized[tiab] OR randomised[tiab] OR placebo[tiab] OR randomly[tiab] OR  
trial[tiab] OR groups[tiab] OR "Epidemiologic Studies"[Mesh] OR "case-control  
studies"[Mesh] OR "Cohort Studies"[Mesh] OR "case control"[tiab] OR Cohort[tiab] OR  
"Follow up"[tiab] OR Observational[tiab] OR Longitudinal[tiab] OR Prospective[tiab] OR  
retrospective[tiab] OR "cross sectional"[tiab] OR "Cross-Sectional Studies"[Mesh] OR  
Investigated[tiab] OR Analysis[tiab] OR Statistics[tiab] OR Data[tiab] OR "statistics and  
numerical data"[sh] OR "epidemiology"[sh])

NOT

(Animals[Mesh] NOT (Animals[Mesh] AND Humans[Mesh]))

NOT

(Injections[Mesh] OR Open-Label[tiab] OR "Product Labeling"[Mesh] OR "Drug  
Labeling"[Mesh] OR "Affinity Labels"[Mesh] OR "Food Labeling"[Mesh] OR "Isotope  
Labeling"[Mesh] OR "Staining and Labeling"[Mesh] OR "In Situ Nick-End Labeling"[Mesh]  
OR "Primed In Situ Labeling"[Mesh] OR Rat[ti] OR Rats[ti] OR Mice[ti] OR Mouse[ti] OR  
Placebo[ti] OR "Drug effects"[sh] OR Drug[ti] OR Drugs[ti] OR "Food and Drug  
Administration"[ti] OR "Food labeling"[ti] OR "Calorie labeling"[ti] OR Injection[ti] OR  
Cigarette[ti])

**Embase**

1  
2  
3  
4 (((Health:ti,ab OR Illness:ti,ab OR Disorder:ti,ab OR Condition:ti,ab OR Disease:ti,ab)))  
5  
6 AND  
7 (((Psychological:ti OR Label:ti,ab OR Labelling:ti,ab OR Labeling:ti,ab) AND  
8 (Diagnosis:ti,ab OR Diagnostic:ti,ab OR Screening:ti,ab OR Screening:ti,ab OR  
9 Screened:ti,ab))))  
10  
11 AND  
12 (((Patient:ti,ab OR Patients:ti,ab OR Individuals:ti,ab OR Self:ti,ab OR Parent:ti,ab OR  
13 Family:ti,ab OR Adult:ti,ab OR Men:ti,ab OR Women:ti,ab)))  
14  
15 AND  
16 (((Attitude:ti,ab OR Awareness:ti,ab OR Stigma:ti,ab OR Beliefs:ti,ab OR Well-being:ti,ab  
17 OR Wellbeing:ti,ab OR Meaning:ti,ab OR Impact:ti,ab OR Effect:ti,ab OR Effects:ti,ab OR  
18 Influence:ti,ab OR Experience:ti,ab)))  
19  
20 AND  
21  
22 (((("Systematic review":ti,ab OR "Systematic Review":it OR "Cochrane Database Syst  
23 Rev.jn" OR "meta analysis":it OR "meta analysis":ti,ab OR ((Search:ti,ab OR Searched:ti,ab  
24 OR Searches:ti,ab) AND (PubMed:ti,ab OR Medline:ti,ab OR Database:ti,ab OR  
25 Databases:ti,ab)) OR "randomized controlled trial":it OR "controlled clinical trial":it OR  
26 randomized:ti,ab OR randomised:ti,ab OR placebo:ti,ab OR randomly:ti,ab OR trial:ti,ab OR  
27 groups:ti,ab OR "Epidemiologic Studies" OR "case-control studies" OR "Cohort Studies" OR  
28 "case control":ti,ab OR Cohort:ti,ab OR "Follow up":ti,ab OR Observational:ti,ab OR  
29 Longitudinal:ti,ab OR Prospective:ti,ab OR retrospective:ti,ab OR "cross sectional":ti,ab OR  
30 "Cross-Sectional Studies" OR Investigated:ti,ab OR Analysis:ti,ab OR Statistics:ti,ab OR  
31 Data:ti,ab OR epidemiology:ti,ab)))  
32  
33 NOT  
34  
35  
36 (((Injections OR Open-Label:ti,ab OR "Product Labeling" OR "Drug Labeling" OR "Drug  
37 Therapy" OR "Affinity Labels" OR "Food Labeling" OR "Isotope Labeling" OR "Staining  
38 and Labeling" OR "In Situ Nick-End Labeling" OR "Primed In Situ Labeling" OR Rat:ti OR  
39 Rats:ti OR Mice:ti OR Mouse:ti OR Placebo:ti OR "Drug effects.hw" OR Drug:ti OR  
40 Drugs:ti OR "Off Label":ti,ab OR Food AND "Drug Administration":ti OR "Food  
41 labeling":ti OR "Calorie labeling":ti OR Injection:ti OR Cigarette:ti)))  
42  
43  
44  
45  
46  
47  
48  
49  
50  
51  
52  
53  
54  
55  
56  
57  
58  
59  
60

**PsychINFO**

((Health.ti,ab OR Illness.ti,ab OR Disorder.ti,ab OR Condition.ti,ab OR Disease.ti,ab))

AND

((Psychological.ti OR Label.ti,ab OR Labelling.ti,ab OR Labeling.ti,ab) AND

(Diagnosis.ti,ab OR Diagnostic.ti,ab OR Screening.ti,ab OR Screening.ti,ab OR

Screened.ti,ab)))

AND

((Patient.ti,ab OR Patients.ti,ab OR Individuals.ti,ab OR Self.ti,ab OR Parent.ti,ab OR

Family.ti,ab OR Adult.ti,ab OR Men.ti,ab OR Women.ti,ab))

AND

((Attitude.ti,ab OR Awareness.ti,ab OR Stigma.ti,ab OR Beliefs.ti,ab OR Well-being.ti,ab

OR Wellbeing.ti,ab OR Meaning.ti,ab OR Impact.ti,ab OR Effect.ti,ab OR Effects.ti,ab OR

Influence.ti,ab OR Experience.ti,ab))

AND

((Systematic review.ti,ab OR Systematic Review.pt OR Cochrane Database Syst Rev.jn OR

meta analysis.pt OR meta analysis.ti,ab OR ((Search.ti,ab OR Searched.ti,ab OR

Searches.ti,ab) AND (PubMed.ti,ab OR Medline.ti,ab OR Database.ti,ab OR

Databases.ti,ab)) OR randomized controlled trial.pt OR controlled clinical trial.pt OR

randomized.ti,ab OR randomised.ti,ab OR placebo.ti,ab OR randomly.ti,ab OR trial.ti,ab OR

groups.ti,ab OR "Epidemiologic Studies" OR "case-control studies" OR "Cohort Studies" OR

case control.ti,ab OR Cohort.ti,ab OR Follow up.ti,ab OR Observational.ti,ab OR

Longitudinal.ti,ab OR Prospective.ti,ab OR retrospective.ti,ab OR cross sectional.ti,ab OR

"Cross-Sectional Studies" OR Investigated.ti,ab OR Analysis.ti,ab OR Statistics.ti,ab OR

Data.ti,ab OR epidemiology.ti,ab))

NOT

((Injections OR Open-Label.ti,ab OR "Product Labeling" OR "Drug Labeling" OR "Drug

Therapy" OR "Affinity Labels" OR "Food Labeling" OR "Isotope Labeling" OR "Staining

and Labeling" OR "In Situ Nick-End Labeling" OR "Primed In Situ Labeling" OR Rat.ti OR

Rats.ti OR Mice.ti OR Mouse.ti OR Placebo.ti OR Drug effects.hw OR Drug.ti OR Drugs.ti

OR Off Label.ti,ab OR Food and Drug Administration.ti OR Food labeling.ti OR Calorie

labeling.ti OR Injection.ti OR Cigarette.ti))

Only

**Cochrane**

(((Health:ti,ab OR Illness:ti,ab OR Disorder:ti,ab OR Condition:ti,ab OR Disease:ti,ab)))

AND

(((Psychological:ti OR Label:ti,ab OR Labelling:ti,ab OR Labeling:ti,ab) AND

(Diagnosis:ti,ab OR Diagnostic:ti,ab OR Screening:ti,ab OR Screening:ti,ab OR

Screened:ti,ab))))

AND

(((Patient:ti,ab OR Patients:ti,ab OR Individuals:ti,ab OR Self:ti,ab OR Parent:ti,ab OR

Family:ti,ab OR Adult:ti,ab OR Men:ti,ab OR Women:ti,ab)))

AND

(((Attitude:ti,ab OR Awareness:ti,ab OR Stigma:ti,ab OR Beliefs:ti,ab OR Well-being:ti,ab

OR Wellbeing:ti,ab OR Meaning:ti,ab OR Impact:ti,ab OR Effect:ti,ab OR Effects:ti,ab OR

Influence:ti,ab OR Experience:ti,ab)))

AND

((( "Systematic review":ti,ab OR "Systematic Review":pt OR "Cochrane Database Syst

Rev.jn" OR "meta analysis":pt OR "meta analysis":ti,ab OR ((Search:ti,ab OR Searched:ti,ab

OR Searches:ti,ab) AND (PubMed:ti,ab OR Medline:ti,ab OR Database:ti,ab OR

Databases:ti,ab)) OR "randomized controlled trial":pt OR "controlled clinical trial":pt OR

randomized:ti,ab OR randomised:ti,ab OR placebo:ti,ab OR randomly:ti,ab OR trial:ti,ab OR

groups:ti,ab OR "Epidemiologic Studies" OR "case-control studies" OR "Cohort Studies" OR

"case control":ti,ab OR Cohort:ti,ab OR "Follow up":ti,ab OR Observational:ti,ab OR

Longitudinal:ti,ab OR Prospective:ti,ab OR retrospective:ti,ab OR "cross sectional":ti,ab OR

"Cross-Sectional Studies" OR Investigated:ti,ab OR Analysis:ti,ab OR Statistics:ti,ab OR

Data:ti,ab OR epidemiology:ti,ab)))

NOT

(((Injections OR Open-Label:ti,ab OR "Product Labeling" OR "Drug Labeling" OR "Drug

Therapy" OR "Affinity Labels" OR "Food Labeling" OR "Isotope Labeling" OR "Staining

and Labeling" OR "In Situ Nick-End Labeling" OR "Primed In Situ Labeling" OR Rat:ti OR

Rats:ti OR Mice:ti OR Mouse:ti OR Placebo:ti OR "Drug effects.hw" OR Drug:ti OR

Drugs:ti OR "Off Label":ti,ab OR Food AND "Drug Administration":ti OR "Food

labeling":ti OR "Calorie labeling":ti OR Injection:ti OR Cigarette:ti)))

**CINAHL**

((((TI Health OR AB Health OR TI Illness OR AB Illness OR TI Disorder OR AB Disorder OR TI Condition OR AB Condition OR TI Disease OR AB Disease)))

AND

((((TI Psychological OR TI Label OR AB Label OR TI Labelling OR AB Labelling OR TI Labeling OR AB Labeling) AND (TI Diagnosis OR AB Diagnosis OR TI Diagnostic OR AB Diagnostic OR TI Screening OR AB Screening OR TI Screening OR AB Screening OR TI Screened OR AB Screened))))

AND

((((TI Patient OR AB Patient OR TI Patients OR AB Patients OR TI Individuals OR AB Individuals OR TI Self OR AB Self OR TI Parent OR AB Parent OR TI Family OR AB Family OR TI Adult OR AB Adult OR TI Men OR AB Men OR TI Women OR AB Women)))

AND

((((TI Attitude OR AB Attitude OR TI Awareness OR AB Awareness OR TI Stigma OR AB Stigma OR TI Beliefs OR AB Beliefs OR TI Well-being OR AB Well-being OR TI Wellbeing OR AB Wellbeing OR TI Meaning OR AB Meaning OR TI Impact OR AB Impact OR TI Effect OR AB Effect OR TI Effects OR AB Effects OR TI Influence OR AB Influence OR TI Experience OR AB Experience)))

AND

((((TI "Systematic review" OR AB "Systematic review" OR PT "Systematic Review" OR "Cochrane Database Syst Rev.jn" OR PT "meta analysis" OR TI "meta analysis" OR AB "meta analysis" OR ((TI Search OR AB Search OR TI Searched OR AB Searched OR TI Searches OR AB Searches) AND (TI PubMed OR AB PubMed OR TI Medline OR AB Medline OR TI Database OR AB Database OR TI Databases OR AB Databases)) OR PT "randomized controlled trial" OR PT "controlled clinical trial" OR TI randomized OR AB randomized OR TI randomised OR AB randomised OR TI placebo OR AB placebo OR TI randomly OR AB randomly OR TI trial OR AB trial OR TI groups OR AB groups OR "Epidemiologic Studies" OR "case-control studies" OR "Cohort Studies" OR TI "case control" OR AB "case control" OR TI Cohort OR AB Cohort OR TI "Follow up" OR AB "Follow up" OR TI Observational OR AB Observational OR TI Longitudinal OR AB Longitudinal OR TI Prospective OR AB Prospective OR TI retrospective OR AB retrospective OR TI "cross sectional" OR AB "cross sectional" OR "Cross-Sectional Studies" OR TI Investigated OR AB Investigated OR TI Analysis OR AB Analysis OR TI Statistics OR AB Statistics OR TI Data OR AB Data OR TI epidemiology OR AB epidemiology)))

NOT

((((Injections OR TI Open-Label OR AB Open-Label OR "Product Labeling" OR "Drug Labeling" OR "Drug Therapy" OR "Affinity Labels" OR "Food Labeling" OR "Isotope Labeling" OR "Staining and Labeling" OR "In Situ Nick-End Labeling" OR "Primed In Situ Labeling" OR TI Rat OR TI Rats OR TI Mice OR TI Mouse OR TI Placebo OR "Drug effects.hw" OR TI Drug OR TI Drugs OR TI "Off Label" OR AB "Off Label" OR Food AND TI "Drug Administration" OR TI "Food labeling" OR TI "Calorie labeling" OR TI Injection OR TI Cigarette)))
