# Supplementary material for: Consequences of health condition labelling: protocol for a systematic scoping review
Source: PubMed Central journal article supplement — BMJ Open. 2020 Oct 26;10(10):e037392. doi: 10.1136/bmjopen-2020-037392 (PMC7592274; doi:10.1136/bmjopen-2020-037392), 2020-10-26
Supplement: bmjopen-2020-037392supp001.pdf [file bmjopen-2020-037392supp001.pdf]

## Supplementary Material

### Search Strategies

#### PubMed

(Health[tiab] OR Illness[tiab] OR Disorder[tiab] OR Condition[tiab] OR Disease[tiab])

AND

((Psychological[ti] OR Label[tiab] OR Labelling[tiab] OR Labeling[tiab]) AND (Diagnosis[tiab] OR Diagnostic[tiab] OR Screening[Mesh] OR Screening[tiab] OR Screened[tiab]))

AND

(Patient[tiab] OR Patients[tiab] OR Individuals[tiab] OR Self[tiab] OR Parent[tiab] OR Family[tiab] OR Adult[tiab] OR Men[tiab] OR Women[tiab])

AND

(Attitude[Mesh] OR Awareness[tiab] OR Stigma[tiab] OR Beliefs[tiab] OR Well-being[tiab] OR Wellbeing[tiab] OR Meaning[tiab] OR Impact[tiab] OR Effect[tiab] OR Effects[tiab] OR Influence[tiab] OR Experience[tiab])

AND

("Systematic review"[tiab] OR "Systematic Review"[pt] OR "Cochrane Database Syst Rev"[ta] OR "meta analysis"[pt] OR "meta analysis"[tiab] OR ((Search[tiab] OR Searched[tiab] OR Searches[tiab]) AND (PubMed[tiab] OR Medline[tiab] OR Database[tiab] OR Databases[tiab])) OR "randomized controlled trial"[pt] OR "controlled clinical trial"[pt] OR randomized[tiab] OR randomised[tiab] OR placebo[tiab] OR randomly[tiab] OR trial[tiab] OR groups[tiab] OR "Epidemiologic Studies"[Mesh] OR "case-control studies"[Mesh] OR "Cohort Studies"[Mesh] OR "case control"[tiab] OR Cohort[tiab] OR "Follow up"[tiab] OR Observational[tiab] OR Longitudinal[tiab] OR Prospective[tiab] OR retrospective[tiab] OR "cross sectional"[tiab] OR "Cross-Sectional Studies"[Mesh] OR Investigated[tiab] OR Analysis[tiab] OR Statistics[tiab] OR Data[tiab] OR "statistics and numerical data"[sh] OR "epidemiology"[sh])

NOT

(Animals[Mesh] NOT (Animals[Mesh] AND Humans[Mesh]))

NOT

(Injections[Mesh] OR Open-Label[tiab] OR "Product Labeling"[Mesh] OR "Drug Labeling"[Mesh] OR "Affinity Labels"[Mesh] OR "Food Labeling"[Mesh] OR "Isotope Labeling"[Mesh] OR "Staining and Labeling"[Mesh] OR "In Situ Nick-End Labeling"[Mesh] OR "Primed In Situ Labeling"[Mesh] OR Rat[ti] OR Rats[ti] OR Mice[ti] OR Mouse[ti] OR Placebo[ti] OR "Drug effects"[sh] OR Drug[ti] OR Drugs[ti] OR "Food and Drug Administration"[ti] OR "Food labeling"[ti] OR "Calorie labeling"[ti] OR Injection[ti] OR Cigarette[ti])

**Embase**

((Health:ti,ab OR Illness:ti,ab OR Disorder:ti,ab OR Condition:ti,ab OR Disease:ti,ab)))  
AND  
(((Psychological:ti OR Label:ti,ab OR Labelling:ti,ab OR Labeling:ti,ab) AND  
(Diagnosis:ti,ab OR Diagnostic:ti,ab OR Screening:ti,ab OR Screening:ti,ab OR  
Screened:ti,ab))))  
AND  
(((Patient:ti,ab OR Patients:ti,ab OR Individuals:ti,ab OR Self:ti,ab OR Parent:ti,ab OR  
Family:ti,ab OR Adult:ti,ab OR Men:ti,ab OR Women:ti,ab)))  
AND  
(((Attitude:ti,ab OR Awareness:ti,ab OR Stigma:ti,ab OR Beliefs:ti,ab OR Well-being:ti,ab  
OR Wellbeing:ti,ab OR Meaning:ti,ab OR Impact:ti,ab OR Effect:ti,ab OR Effects:ti,ab OR  
Influence:ti,ab OR Experience:ti,ab)))  
AND  
(((Systematic review":ti,ab OR "Systematic Review":it OR "Cochrane Database Syst  
Rev.jn" OR "meta analysis":it OR "meta analysis":ti,ab OR ((Search:ti,ab OR Searched:ti,ab  
OR Searches:ti,ab) AND (PubMed:ti,ab OR Medline:ti,ab OR Database:ti,ab OR  
Databases:ti,ab)) OR "randomized controlled trial":it OR "controlled clinical trial":it OR  
randomized:ti,ab OR randomised:ti,ab OR placebo:ti,ab OR randomly:ti,ab OR trial:ti,ab OR  
groups:ti,ab OR "Epidemiologic Studies" OR "case-control studies" OR "Cohort Studies" OR  
"case control":ti,ab OR Cohort:ti,ab OR "Follow up":ti,ab OR Observational:ti,ab OR  
Longitudinal:ti,ab OR Prospective:ti,ab OR retrospective:ti,ab OR "cross sectional":ti,ab OR  
"Cross-Sectional Studies" OR Investigated:ti,ab OR Analysis:ti,ab OR Statistics:ti,ab OR  
Data:ti,ab OR epidemiology:ti,ab)))  
NOT  
(((Injections OR Open-Label:ti,ab OR "Product Labeling" OR "Drug Labeling" OR "Drug  
Therapy" OR "Affinity Labels" OR "Food Labeling" OR "Isotope Labeling" OR "Staining  
and Labeling" OR "In Situ Nick-End Labeling" OR "Primed In Situ Labeling" OR Rat:ti OR  
Rats:ti OR Mice:ti OR Mouse:ti OR Placebo:ti OR "Drug effects.hw" OR Drug:ti OR  
Drugs:ti OR "Off Label":ti,ab OR Food AND "Drug Administration":ti OR "Food  
labeling":ti OR "Calorie labeling":ti OR Injection:ti OR Cigarette:ti)))

**PsychINFO**

((Health.ti,ab OR Illness.ti,ab OR Disorder.ti,ab OR Condition.ti,ab OR Disease.ti,ab))

AND

((Psychological.ti OR Label.ti,ab OR Labelling.ti,ab OR Labeling.ti,ab) AND  
(Diagnosis.ti,ab OR Diagnostic.ti,ab OR Screening.ti,ab OR Screening.ti,ab OR  
Screened.ti,ab)))

AND

((Patient.ti,ab OR Patients.ti,ab OR Individuals.ti,ab OR Self.ti,ab OR Parent.ti,ab OR  
Family.ti,ab OR Adult.ti,ab OR Men.ti,ab OR Women.ti,ab))

AND

((Attitude.ti,ab OR Awareness.ti,ab OR Stigma.ti,ab OR Beliefs.ti,ab OR Well-being.ti,ab  
OR Wellbeing.ti,ab OR Meaning.ti,ab OR Impact.ti,ab OR Effect.ti,ab OR Effects.ti,ab OR  
Influence.ti,ab OR Experience.ti,ab))

AND

((Systematic review.ti,ab OR Systematic Review.pt OR Cochrane Database Syst Rev.jn OR  
meta analysis.pt OR meta analysis.ti,ab OR ((Search.ti,ab OR Searched.ti,ab OR  
Searches.ti,ab) AND (PubMed.ti,ab OR Medline.ti,ab OR Database.ti,ab OR  
Databases.ti,ab)) OR randomized controlled trial.pt OR controlled clinical trial.pt OR  
randomized.ti,ab OR randomised.ti,ab OR placebo.ti,ab OR randomly.ti,ab OR trial.ti,ab OR  
groups.ti,ab OR "Epidemiologic Studies" OR "case-control studies" OR "Cohort Studies" OR  
case control.ti,ab OR Cohort.ti,ab OR Follow up.ti,ab OR Observational.ti,ab OR  
Longitudinal.ti,ab OR Prospective.ti,ab OR retrospective.ti,ab OR cross sectional.ti,ab OR  
"Cross-Sectional Studies" OR Investigated.ti,ab OR Analysis.ti,ab OR Statistics.ti,ab OR  
Data.ti,ab OR epidemiology.ti,ab))

NOT

((Injections OR Open-Label.ti,ab OR "Product Labeling" OR "Drug Labeling" OR "Drug  
Therapy" OR "Affinity Labels" OR "Food Labeling" OR "Isotope Labeling" OR "Staining  
and Labeling" OR "In Situ Nick-End Labeling" OR "Primed In Situ Labeling" OR Rat.ti OR  
Rats.ti OR Mice.ti OR Mouse.ti OR Placebo.ti OR Drug effects.hw OR Drug.ti OR Drugs.ti  
OR Off Label.ti,ab OR Food and Drug Administration.ti OR Food labeling.ti OR Calorie  
labeling.ti OR Injection.ti OR Cigarette.ti))

**Cochrane**

((Health:ti,ab OR Illness:ti,ab OR Disorder:ti,ab OR Condition:ti,ab OR Disease:ti,ab)))  
AND  
(((Psychological:ti OR Label:ti,ab OR Labelling:ti,ab OR Labeling:ti,ab) AND  
(Diagnosis:ti,ab OR Diagnostic:ti,ab OR Screening:ti,ab OR Screening:ti,ab OR  
Screened:ti,ab))))  
AND  
(((Patient:ti,ab OR Patients:ti,ab OR Individuals:ti,ab OR Self:ti,ab OR Parent:ti,ab OR  
Family:ti,ab OR Adult:ti,ab OR Men:ti,ab OR Women:ti,ab)))  
AND  
(((Attitude:ti,ab OR Awareness:ti,ab OR Stigma:ti,ab OR Beliefs:ti,ab OR Well-being:ti,ab  
OR Wellbeing:ti,ab OR Meaning:ti,ab OR Impact:ti,ab OR Effect:ti,ab OR Effects:ti,ab OR  
Influence:ti,ab OR Experience:ti,ab)))  
AND  
(((("Systematic review":ti,ab OR "Systematic Review":pt OR "Cochrane Database Syst  
Rev.jn" OR "meta analysis":pt OR "meta analysis":ti,ab OR ((Search:ti,ab OR Searched:ti,ab  
OR Searches:ti,ab) AND (PubMed:ti,ab OR Medline:ti,ab OR Database:ti,ab OR  
Databases:ti,ab)) OR "randomized controlled trial":pt OR "controlled clinical trial":pt OR  
randomized:ti,ab OR randomised:ti,ab OR placebo:ti,ab OR randomly:ti,ab OR trial:ti,ab OR  
groups:ti,ab OR "Epidemiologic Studies" OR "case-control studies" OR "Cohort Studies" OR  
"case control":ti,ab OR Cohort:ti,ab OR "Follow up":ti,ab OR Observational:ti,ab OR  
Longitudinal:ti,ab OR Prospective:ti,ab OR retrospective:ti,ab OR "cross sectional":ti,ab OR  
"Cross-Sectional Studies" OR Investigated:ti,ab OR Analysis:ti,ab OR Statistics:ti,ab OR  
Data:ti,ab OR epidemiology:ti,ab)))  
NOT  
(((Injections OR Open-Label:ti,ab OR "Product Labeling" OR "Drug Labeling" OR "Drug  
Therapy" OR "Affinity Labels" OR "Food Labeling" OR "Isotope Labeling" OR "Staining  
and Labeling" OR "In Situ Nick-End Labeling" OR "Primed In Situ Labeling" OR Rat:ti OR  
Rats:ti OR Mice:ti OR Mouse:ti OR Placebo:ti OR "Drug effects.hw" OR Drug:ti OR  
Drugs:ti OR "Off Label":ti,ab OR Food AND "Drug Administration":ti OR "Food  
labeling":ti OR "Calorie labeling":ti OR Injection:ti OR Cigarette:ti)))

**CINAHL**

((((TI Health OR AB Health OR TI Illness OR AB Illness OR TI Disorder OR AB Disorder OR TI Condition OR AB Condition OR TI Disease OR AB Disease)))

AND

((((TI Psychological OR TI Label OR AB Label OR TI Labelling OR AB Labelling OR TI Labeling OR AB Labeling) AND (TI Diagnosis OR AB Diagnosis OR TI Diagnostic OR AB Diagnostic OR TI Screening OR AB Screening OR TI Screening OR AB Screening OR TI Screened OR AB Screened))))

AND

((((TI Patient OR AB Patient OR TI Patients OR AB Patients OR TI Individuals OR AB Individuals OR TI Self OR AB Self OR TI Parent OR AB Parent OR TI Family OR AB Family OR TI Adult OR AB Adult OR TI Men OR AB Men OR TI Women OR AB Women)))

AND

((((TI Attitude OR AB Attitude OR TI Awareness OR AB Awareness OR TI Stigma OR AB Stigma OR TI Beliefs OR AB Beliefs OR TI Well-being OR AB Well-being OR TI Wellbeing OR AB Wellbeing OR TI Meaning OR AB Meaning OR TI Impact OR AB Impact OR TI Effect OR AB Effect OR TI Effects OR AB Effects OR TI Influence OR AB Influence OR TI Experience OR AB Experience)))

AND

((((TI "Systematic review" OR AB "Systematic review" OR PT "Systematic Review" OR "Cochrane Database Syst Rev.jn" OR PT "meta analysis" OR TI "meta analysis" OR AB "meta analysis" OR ((TI Search OR AB Search OR TI Searched OR AB Searched OR TI Searches OR AB Searches) AND (TI PubMed OR AB PubMed OR TI Medline OR AB Medline OR TI Database OR AB Database OR TI Databases OR AB Databases)) OR PT "randomized controlled trial" OR PT "controlled clinical trial" OR TI randomized OR AB randomized OR TI randomised OR AB randomised OR TI placebo OR AB placebo OR TI randomly OR AB randomly OR TI trial OR AB trial OR TI groups OR AB groups OR "Epidemiologic Studies" OR "case-control studies" OR "Cohort Studies" OR TI "case control" OR AB "case control" OR TI Cohort OR AB Cohort OR TI "Follow up" OR AB "Follow up" OR TI Observational OR AB Observational OR TI Longitudinal OR AB Longitudinal OR TI Prospective OR AB Prospective OR TI retrospective OR AB retrospective OR TI "cross sectional" OR AB "cross sectional" OR "Cross-Sectional Studies" OR TI Investigated OR AB Investigated OR TI Analysis OR AB Analysis OR TI Statistics OR AB Statistics OR TI Data OR AB Data OR TI epidemiology OR AB epidemiology)))

NOT

((((Injections OR TI Open-Label OR AB Open-Label OR "Product Labeling" OR "Drug Labeling" OR "Drug Therapy" OR "Affinity Labels" OR "Food Labeling" OR "Isotope Labeling" OR "Staining and Labeling" OR "In Situ Nick-End Labeling" OR "Primed In Situ Labeling" OR TI Rat OR TI Rats OR TI Mice OR TI Mouse OR TI Placebo OR "Drug effects.hw" OR TI Drug OR TI Drugs OR TI "Off Label" OR AB "Off Label" OR Food AND TI "Drug Administration" OR TI "Food labeling" OR TI "Calorie labeling" OR TI Injection OR TI Cigarette)))
